# Supplementary material
Source: publisher figshare collection journal article supplement (https://tandf.figshare.com/ndownloader/files/13708829)
Supplement: Supplementary file 1 [file 13708829]

# Supplementary information

**Synthesis and mesomorphic properties of the nematic mesophase benzoxazole liquid crystals derivatives with big twist angle of difluoro-biphenyl unit**

Qiang Weng1, Longyan Duan1, Pei Chen1, Aiai Gao2, Xinbing Chen*1, Zhongwei An*1,2

*1 Key Laboratory of Applied Surface and Colloid Chemistry (MOE); Shaanxi Key Laboratory for Advanced Energy Devices; Shaanxi Engineering Laboratory for Advanced Energy Technology, School of Materials Science and Engineering, Shaanxi Normal University, Xi'an 710119, PR China*

*2 Xi'an Modern Chemistry Research Institute, Xi'an 710065, PR China*

Table S1. Maxima peaks of UV-vis and fluorescence spectra for nPF(2)PF(2)Bx and reference compounds I and II.

|  | UV-vis (nm) | | | FL (nm) | | |
| --- | --- | --- | --- | --- | --- | --- |
| x | 7PF(2)PF(2)Bx | Compound I | Compound II | 7PF(2)PF(2)Bx | Compound I | Compound II |
| H | 315.0 | 319.0 | 322.0 | 382.4 | 385.0 | 397.7 |
| CH3 | 318.0 | 323.0 | 325.5 | 380.4 | 385.0 | 395.8 |
| NO2 | 317.0 | 321.0 | 330.5 | -- | -- | -- |

Note: The alkoxy chain of compound I and II are heptyloxy group.


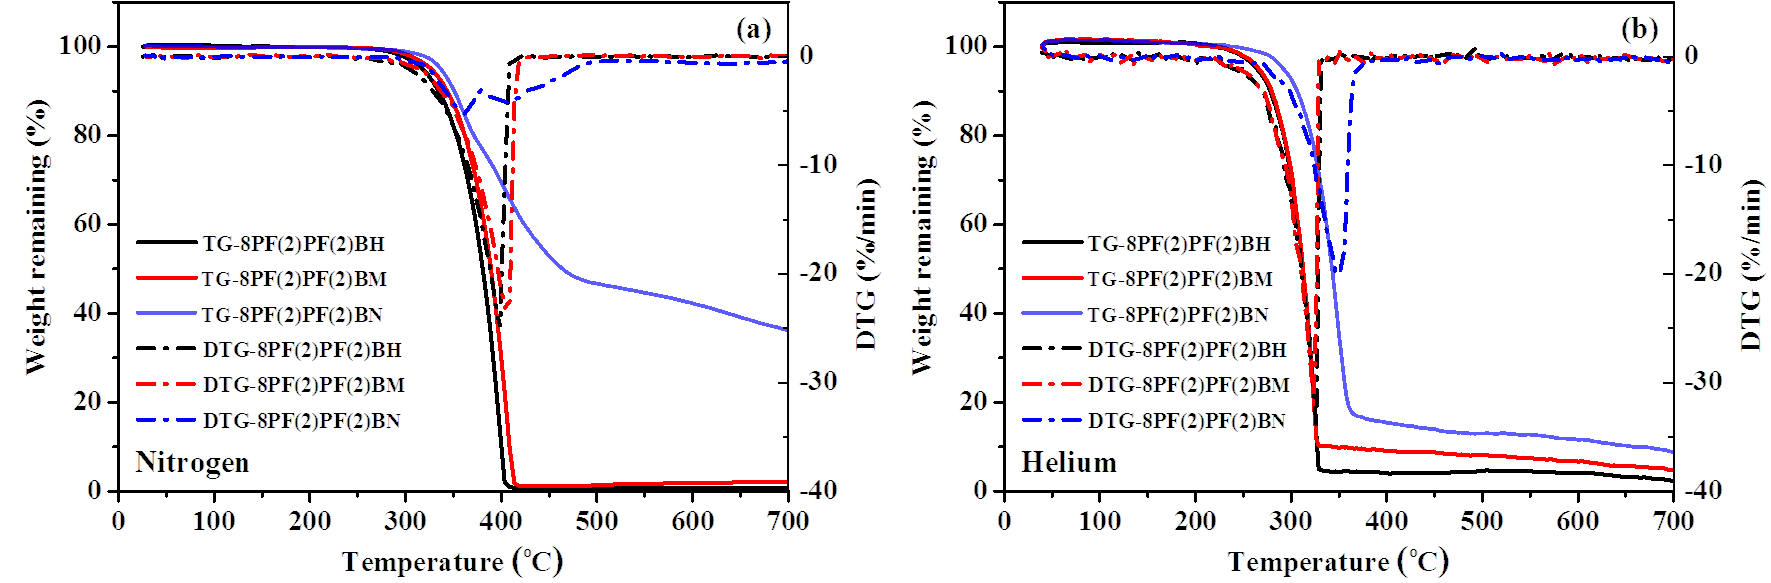


Figure S1. TGA and DTG curves of compounds 8PF(2)PF(2)Bx under nitrogen (a) and helium (b) at heating rates of 10 oC/min.

***Spectroscopic data for 1-bromo-2-fluoro-4-alkoxy benzene (nPF(2)Br)***

**2PF(2)Br:** Colorless liqud, yield 97%. 1H-NMR (400 MHz, CDCl3, TMS) δ (ppm) = 7.43-7.34 (dd, *3J*H-H = 8.5 Hz, *4J*H-F = 8.5 Hz, 1H), 6.72 – 6.63 (dd, *3J*H-F = 10.5 Hz, *4J*H-H = 2.8 Hz, 1H), 6.63 – 6.55 (ddd, *3J*H-H = 8.9 Hz, *4J*H-H = 2.8 Hz, *5J*H-F = 1.1 Hz, 1H), 4.04 – 3.93 (q, *3J*H-H = 7.0 Hz, 2H), 1.45 – 1.36 (t, *3J*H-H = 7.0 Hz, 3H). IR (KBr, pellet, cm-1): 2984, 2936, 2897, 1605, 1583, 1491, 1475, 1419, 1394, 1322, 1291, 1262, 1239, 1170, 1145, 1057, 1033, 897, 843, 794. EI-MS m/z (rel. int.): 219.68 (M+, 56), 191.67 (100), 174.78 (3), 110.84 (6).

**3PF(2)Br:** Colorless liqud, yield 93%. 1H-NMR (400 MHz, CDCl3, TMS) δ (ppm) = 7.43-7.34 (dd, *3J*H-H = 8.5 Hz, *4J*H-F = 8.5 Hz, 1H), 6.72 – 6.64 (dd, *3J*H-F = 10.5 Hz, *4J*H-H = 2.8 Hz, 1H), 6.64 – 6.56 (ddd, *3J*H-H = 8.9 Hz, *4J*H-H = 2.8 Hz, *5J*H-F = 0.9 Hz, 1H), 3.91 – 3.83 (t, *3J*H-H = 6.6 Hz, 2H), 1.87 – 1.75 (m, 2H, overlap), 1.07 – 0.98 (t, *3J*H-H = 7.4 Hz, 3H). IR (KBr, pellet, cm-1): 2968, 2938, 2879, 1606, 1584, 1489, 1471, 1433, 1391, 1322, 1293, 1262, 1239, 1175, 1144, 1067, 1015, 851, 832, 796. EI-MS m/z (rel. int.): 233.68 (M+, 33), 191.69 (100), 172.49 (3), 110.83 (5).

**4PF(2)Br:** Colorless liqud, yield 96%. 1H-NMR (400 MHz, CDCl3, TMS) δ (ppm) = 7.43-7.34 (dd, *3J*H-H = 8.2 Hz, *4J*H-F = 8.2 Hz, 1H), 6.72 – 6.64 (dd, *3J*H-F = 10.5 Hz, *4J*H-H = 2.8 Hz, 1H), 6.63 – 6.55 (ddd, *3J*H-H = 8.9 Hz, *4J*H-H = 2.9 Hz, *5J*H-F = 1.1 Hz, 1H), 3.95 – 3.87 (t, *3J*H-H = 6.5 Hz, 2H), 1.82 – 1.69 (m, 2H, overlap), 1.55 – 1.41 (m, 2H, overlap), 1.02 – 0.93 (t, *3J*H-H = 7.4 Hz, 3H). IR (KBr, pellet, cm-1): 2961, 2935, 2874, 1605, 1583, 1490, 1469, 1433, 1391, 1322, 1292, 1261, 1239, 1174, 1144, 1069, 1010, 851, 833, 794. EI-MS m/z (rel. int.): 247.73 (M+, 34), 191.68 (100), 172.74 (4), 110.85 (4).

**5PF(2)Br:** Colorless liqud, yield 98%. 1H-NMR (400 MHz, CDCl3, TMS) δ (ppm) = 7.41-7.35 (dd, *3J*H-H = 8.2 Hz, *4J*H-F = 8.2 Hz, 1H), 6.70 – 6.65 (dd, *3J*H-F = 10.6 Hz, *4J*H-H = 2.8 Hz, 1H), 6.61 – 6.57 (ddd, *3J*H-H = 8.9 Hz, *4J*H-H = 2.8 Hz, *5J*H-F = 1.0 Hz, 1H), 3.93 – 3.88 (t, *3J*H-H = 6.6 Hz, 2H), 1.81 – 1.73 (m, 2H, overlap), 1.45 – 1.34 (m, 4H, overlap), 0.96 – 0.90 (t, *3J*H-H = 7.2 Hz, 3H). IR (KBr, pellet, cm-1): 2957, 2935, 2872, 1606, 1584, 1490, 1469, 1419, 1390, 1322, 1292, 1262, 1239, 1174, 1144, 1055, 1016, 849, 832, 795. EI-MS m/z (rel. int.): 261.82 (M+, 34), 191.72 (100), 172.75 (5), 110.92 (3).

**6PF(2)Br:** Colorless liqud, yield 98%. 1H-NMR (400 MHz, CDCl3, TMS) δ (ppm) = 7.45-7.32 (dd, *3J*H-H = 8.2 Hz, *4J*H-F = 8.2 Hz, 1H), 6.74 – 6.64 (dd, *3J*H-F = 10.5 Hz, *4J*H-H = 2.8 Hz, 1H), 6.63 – 6.54 (ddd, *3J*H-H = 8.9 Hz, *4J*H-H = 2.8 Hz, *5J*H-F = 1.1 Hz, 1H), 3.96 – 3.84 (t, *3J*H-H = 6.6 Hz, 2H), 1.83 – 1.70 (m, 2H, overlap), 1.49 – 1.29 (m, 6H, overlap), 0.95 – 0.86 (t, *3J*H-H = 7.0 Hz, 3H). IR (KBr, pellet, cm-1): 2954, 2932, 2859, 1605, 1584, 1490, 1469, 1433, 1390, 1322, 1292, 1261, 1239, 1173, 1144, 1055, 1018, 850, 833, 794. EI-MS m/z (rel. int.): 275.91 (M+, 26), 191.71 (100), 172.72 (4), 110.86 (2).

**7PF(2)Br:** Colorless liqud, yield 98%. 1H-NMR (400 MHz, CDCl3, TMS) δ (ppm) = 7.45-7.30 (dd, *3J*H-H = 8.1 Hz, *4J*H-F = 8.1 Hz, 1H), 6.71 – 6.64 (dd, *3J*H-F = 10.5 Hz, *4J*H-H = 2.8 Hz, 1H), 6.63 – 6.56 (ddd, *3J*H-H = 8.9 Hz, *4J*H-H = 2.8 Hz, *5J*H-F = 1.1 Hz, 1H), 3.97 – 3.84 (t, *3J*H-H = 6.6 Hz, 2H), 1.83 – 1.71 (m, 2H, overlap), 1.47 – 1.26 (m, 8H, overlap), 0.94 – 0.85 (t, *3J*H-H = 7.0 Hz, 3H). IR (KBr, pellet, cm-1): 2954, 2930, 2857, 1605, 1584, 1490, 1469, 1433, 1389, 1322, 1292, 1261, 1239, 1169, 1144, 1055, 1017, 849, 831, 795. EI-MS m/z (rel. int.): 289.46 (M+, 14), 191.69 (100), 172.7 (5), 110.86 (2).

**8PF(2)Br:** Colorless liqud, yield 97%. 1H-NMR (400 MHz, CDCl3, TMS) δ (ppm) = 7.43-7.35 (dd, *3J*H-H = 8.1 Hz, *4J*H-F = 8.1 Hz, 1H), 6.72 – 6.66 (dd, *3J*H-F = 10.5 Hz, *4J*H-H = 2.8 Hz, 1H), 6.63 – 6.57 (ddd, *3J*H-H = 8.9 Hz, *4J*H-H = 2.9 Hz, *5J*H-F = 1.1 Hz, 1H), 3.96 – 3.87 (t, *3J*H-H = 6.6 Hz, 2H), 1.83 – 1.72 (m, 2H, overlap), 1.47 – 1.26 (m, 10H, overlap), 0.93 – 0.85 (t, *3J*H-H = 6.8 Hz, 3H). IR (KBr, pellet, cm-1): 2927, 2856, 1605, 1584, 1490, 1469, 1419, 1388, 1322, 1292, 1262, 1239, 1170, 1144, 1055, 1019, 850, 832, 794. EI-MS m/z (rel. int.): 304.13 (M+, 7), 189.92 (100), 172.99 (4), 112.1 (2).

**9PF(2)Br:** Colorless liqud, yield 98%. 1H-NMR (400 MHz, CDCl3, TMS) δ (ppm) = 7.43-7.33 (dd, *3J*H-H = 8.2 Hz, *4J*H-F = 8.2 Hz, 1H), 6.72 – 6.64 (dd, *3J*H-F = 10.5 Hz, *4J*H-H = 2.8 Hz, 1H), 6.63 – 6.55 (ddd, *3J*H-H = 8.9 Hz, *4J*H-H = 2.8 Hz, *5J*H-F = 1.0 Hz, 1H), 3.95 – 3.87 (t, *3J*H-H = 6.6 Hz, 2H), 1.83 – 1.71 (m, 2H, overlap), 1.48 – 1.26 (m, 12H, overlap), 0.93 – 0.85 (t, *3J*H-H = 6.9 Hz, 3H). IR (KBr, pellet, cm-1): 2926, 2855, 1605, 1584, 1490, 1469, 1418, 1386, 1322, 1292, 1262, 1239, 1169, 1144, 1055, 1018, 850, 831, 795. EI-MS m/z (rel. int.): 318.17 (M+, 4), 189.95 (100), 172.99 (5), 112.08 (3).

**10PF(2)Br:** Colorless liqud, yield 98%. 1H-NMR (400 MHz, CDCl3, TMS) δ (ppm) = 7.43-7.33 (dd, *3J*H-H = 8.5 Hz, *4J*H-F = 8.5 Hz, 1H), 6.72 – 6.64 (dd, *3J*H-F = 10.5 Hz, *4J*H-H = 2.8 Hz, 1H), 6.63 – 6.55 (ddd, *3J*H-H = 8.9 Hz, *4J*H-H = 2.9 Hz, *5J*H-F = 0.9 Hz, 1H), 3.95 – 3.86 (t, *3J*H-H = 6.6 Hz, 2H), 1.83 – 1.71 (m, 2H, overlap), 1.47 – 1.23 (m, 14H, overlap), 0.93 – 0.84 (t, *3J*H-H = 6.9 Hz, 3H). IR (KBr, pellet, cm-1): 2926, 2855, 1605, 1584, 1490, 1469, 1434, 1387, 1322, 1292, 1262, 1239, 1169, 1144, 1056, 1017, 850, 832, 794. EI-MS m/z (rel. int.): 332.19 (M+, 10), 189.93 (100), 172.99 (5), 111.14 (5).

***Spectroscopic data for 2,2'-difluoro-4'-alkoxy-1,1'-biphenyl-4-carboxaldehyde (nPF(2)PF(2)CHO)***

**2PF(2)PF(2)CHO:** White solid, yield 86%. 1H-NMR (400 MHz, CDCl3, TMS) δ (ppm) = 10.00 (s, 1H), 7.76 – 7.68 (dd, *3J*H-H = 7.9 Hz, *4J*H-H = 1.7 Hz, 1H), 7.67 – 7.61 (dd, *3J*H-F = 9.6 Hz, *4J*H-H = 1.4 Hz, 1H), 7.58 – 7.51 (dd, *3J*H-H = 7.3 Hz, *4J*H-F = 7.3 Hz, 1H), 7.34 – 7.27 (dd, *3J*H-H = 8.5 Hz, *4J*H-F = 8.5 Hz, 1H), 6.82 – 6.76 (dd, *3J*H-H = 8.6 Hz, *4J*H-H = 2.5 Hz, 1H), 6.75 – 6.66 (dd, *3J*H-F = 12.0 Hz, *4J*H-H = 2.3 Hz, 1H), 4.11 – 3.98 (q, *3J*H-H = 7.0 Hz, 2H), 1.49 – 1.36 (t, *3J*H-H = 7.0 Hz, 3H). IR (KBr, pellet, cm-1): 2986, 2937, 2838, 1699, 1626, 1562, 1522, 1491, 1472, 1414, 1395, 1321, 1271, 1232, 1174, 1104, 1043, 1009, 829, 780. EI-MS m/z (rel. int.): 262.37 (M+, 4), 232.89 (100), 205.36 (8), 187.93 (7).

**3PF(2)PF(2)CHO:** White solid, yield 93%. 1H-NMR (400 MHz, CDCl3, TMS) δ (ppm) = 10.01 (s, 1H), 7.74 – 7.70 (dd, *3J*H-H = 7.8 Hz, *4J*H-H = 1.6 Hz, 1H), 7.67 – 7.63 (dd, *3J*H-F = 9.7 Hz, *4J*H-H = 1.5 Hz, 1H), 7.60 – 7.51 (dd, *3J*H-H = 7.4 Hz, *4J*H-F = 7.4 Hz, 1H), 7.36 – 7.27 (dd, *3J*H-H = 8.5 Hz, *4J*H-F = 8.5 Hz, 1H), 6.82 – 6.77 (dd, *3J*H-H = 8.5 Hz, *4J*H-H = 2.5 Hz, 1H), 6.76 – 6.70 (dd, *3J*H-F = 12.0 Hz, *4J*H-H = 2.5 Hz, 1H), 3.99 – 3.91 (t, *3J*H-H = 6.5 Hz, 2H), 1.91 – 1.78 (m, 2H, overlap), 1.10 – 1.01 (t, *3J*H-H = 7.4 Hz, 3H). IR (KBr, pellet, cm-1): 2966, 2879, 1697, 1624, 1562, 1523, 1491, 1474, 1420 1389, 1324, 1292, 1253, 1166, 1105, 1046, 1027, 831, 779. EI-MS m/z (rel. int.): 276.01 (M+, 36), 234.01 (100), 205.02 (9), 188.02 (9).

**4PF(2)PF(2)CHO:** White solid, yield 86%. 1H-NMR (400 MHz, CDCl3, TMS) δ (ppm) = 10.01 (s, 1H), 7.76 – 7.69 (dd, *3J*H-H = 7.8 Hz, *4J*H-H = 1.6 Hz, 1H), 7.69 – 7.61 (dd, *3J*H-F = 9.7 Hz, *4J*H-H = 1.5 Hz, 1H), 7.60 – 7.51 (dd, *3J*H-H = 7.4 Hz, *4J*H-F = 7.4 Hz, 1H), 7.36 – 7.26 (dd, *3J*H-H = 8.5 Hz, *4J*H-F = 8.5 Hz, 1H), 6.82 – 6.77 (dd, *3J*H-H = 8.5 Hz, *4J*H-H = 2.4 Hz, 1H), 6.76 – 6.70 (dd, *3J*H-F = 12.0 Hz, *4J*H-H = 2.5 Hz, 1H), 4.04 – 3.95 (t, *3J*H-H = 6.5 Hz, 2H), 1.85 – 1.73 (m, 2H, overlap), 1.58 – 1.43 (m, 2H, overlap), 1.03 – 0.95 (t, *3J*H-H = 7.4 Hz, 3H). IR (KBr, pellet, cm-1): 2963, 2874, 1694, 1620, 1559, 1524, 1487, 1474, 1419, 1385, 1328, 1292, 1251, 1168, 1114, 1035, 1002, 819, 780. EI-MS m/z (rel. int.): 290.03 (M+, 32), 234.02 (100), 205.02 (6), 188.02 (7).

**5PF(2)PF(2)CHO:** White solid, yield 88%. 1H-NMR (400 MHz, CDCl3, TMS) δ (ppm) = 10.01 (s, 1H), 7.74 – 7.70 (dd, *3J*H-H = 7.8 Hz, *4J*H-H = 1.6 Hz, 1H), 7.67 – 7.63 (dd, *3J*H-F = 9.7 Hz, *4J*H-H = 1.4 Hz, 1H), 7.60 – 7.51 (dd, *3J*H-H = 7.4 Hz, *4J*H-F = 7.4 Hz, 1H), 7.36 – 7.26 (dd, *3J*H-H = 8.5 Hz, *4J*H-F = 8.5 Hz, 1H), 6.82 – 6.77 (dd, *3J*H-H = 8.6 Hz, *4J*H-H = 2.5 Hz, 1H), 6.76 – 6.71 (dd, *3J*H-F = 12.1 Hz, *4J*H-H = 2.5 Hz, 1H), 4.13 – 3.86 (t, *3J*H-H = 6.5 Hz, 2H), 1.87 – 1.75 (m, 2H, overlap), 1.52 – 1.32 (m, 4H, overlap), 0.99 – 0.90 (t, *3J*H-H = 7.1 Hz, 3H). IR (KBr, pellet, cm-1): 2957, 2872, 1700, 1624, 1564, 1523, 1491, 1471, 1420, 1388, 1326, 1292, 1274, 1166, 1106, 1029, 1002, 833, 780. EI-MS m/z (rel. int.): 304.13 (M+, 18), 233.43 (100), 205.27 (5), 188.1 (3).

**6PF(2)PF(2)CHO:** White solid, yield 90%. 1H-NMR (400 MHz, CDCl3, TMS) δ (ppm) = 10.01 (s, 1H), 7.76 – 7.68 (dd, *3J*H-H = 7.8 Hz, *4J*H-H = 1.6 Hz, 1H), 7.68 – 7.61 (dd, *3J*H-F = 9.7 Hz, *4J*H-H = 1.5 Hz, 1H), 7.60 – 7.51 (dd, *3J*H-H = 7.4 Hz, *4J*H-F = 7.4 Hz, 1H), 7.36 – 7.26 (dd, *3J*H-H = 8.6 Hz, *4J*H-F = 8.6 Hz, 1H), 6.82 – 6.77 (dd, *3J*H-H = 8.6 Hz, *4J*H-H = 2.4 Hz, 1H), 6.76 – 6.71 (dd, *3J*H-F = 12.1 Hz, *4J*H-H = 2.5 Hz, 1H), 4.03 – 3.94 (t, *3J*H-H = 6.5 Hz, 2H), 1.86 – 1.74 (m, 2H, overlap), 1.52 – 1.30 (m, 6H, overlap), 0.96 – 0.87 (t, *3J*H-H = 7.1 Hz, 3H). IR (KBr, pellet, cm-1): 2933, 2859, 1700, 1624, 1564, 1523, 1491, 1471, 1420, 1388, 1326, 1292, 1274, 1166, 1106, 1031, 1004, 834, 780. EI-MS m/z (rel. int.): 318.25 (M+, 11), 234.15 (100), 205.15 (6), 188.13 (8).

**7PF(2)PF(2)CHO:** White solid, yield 87%. 1H-NMR (400 MHz, CDCl3, TMS) δ (ppm) = 10.01 (s, 1H), 7.76 – 7.68 (dd, *3J*H-H = 7.8 Hz, *4J*H-H = 1.5 Hz, 1H), 7.68 – 7.61 (dd, *3J*H-F = 9.7 Hz, *4J*H-H = 1.5 Hz, 1H), 7.60 – 7.51 (dd, *3J*H-H = 7.4 Hz, *4J*H-F = 7.4 Hz, 1H), 7.36 – 7.26 (dd, *3J*H-H = 8.6 Hz, *4J*H-F = 8.6 Hz, 1H), 6.82 – 6.77 (dd, *3J*H-H = 8.6 Hz, *4J*H-H = 2.4 Hz, 1H), 6.76 – 6.71 (dd, *3J*H-F = 12.1 Hz, *4J*H-H = 2.4 Hz, 1H), 4.03 – 3.94 (t, *3J*H-H = 6.5 Hz, 2H), 1.86 – 1.74 (m, 2H, overlap), 1.52 – 1.30 (m, 8H, overlap), 0.96 – 0.87 (t, *3J*H-H = 6.9 Hz, 3H). IR (KBr, pellet, cm-1): 2928, 2857, 1699, 1624, 1563, 1523, 1491, 1472, 1420, 1387, 1327, 1293, 1224, 1166, 1107, 1028, 1005, 832, 780. EI-MS m/z (rel. int.): 332.21 (M+, 10), 234.14 (100), 205.14 (6), 188.12 (7).

**8PF(2)PF(2)CHO:** White solid, yield 93%. 1H-NMR (400 MHz, CDCl3, TMS) δ (ppm) = 10.01 (s, 1H), 7.76 – 7.69 (dd, *3J*H-H = 7.8 Hz, *4J*H-H = 1.6 Hz, 1H), 7.69 – 7.61 (dd, *3J*H-F = 9.7 Hz, *4J*H-H = 1.5 Hz, 1H), 7.60 – 7.51 (dd, *3J*H-H = 7.4 Hz, *4J*H-F = 7.4 Hz, 1H), 7.36 – 7.26 (dd, *3J*H-H = 8.6 Hz, *4J*H-F = 8.6 Hz, 1H), 6.82 – 6.77 (dd, *3J*H-H = 8.6 Hz, *4J*H-H = 2.5 Hz, 1H), 6.76 – 6.71 (dd, *3J*H-F = 12.1 Hz, *4J*H-H = 2.4 Hz, 1H), 4.03 – 3.94 (t, *3J*H-H = 6.5 Hz, 2H), 1.87 – 1.74 (m, 2H, overlap), 1.51 – 1.26 (m, 10H, overlap), 0.93 – 0.85 (t, *3J*H-H = 6.9 Hz, 3H). IR (KBr, pellet, cm-1): 2928, 2857, 1699, 1624, 1563, 1523, 1491, 1471, 1420, 1389, 1328, 1292, 1253, 1166, 1106, 1032, 1002, 833, 780. EI-MS m/z (rel. int.): 346.1 (M+, 11), 234.01 (100), 205.02 (4), 188.01 (5).

**9PF(2)PF(2)CHO:** Colorless liqud, yield 95%. 1H-NMR (400 MHz, CDCl3, TMS) δ (ppm) = 10.01 (s, 1H), 7.76 – 7.69 (dd, *3J*H-H = 7.8 Hz, *4J*H-H = 1.5 Hz, 1H), 7.69 – 7.62 (dd, *3J*H-F = 9.7 Hz, *4J*H-H = 1.4 Hz, 1H), 7.60 – 7.51 (dd, *3J*H-H = 7.4 Hz, *4J*H-F = 7.4 Hz, 1H), 7.36 – 7.27 (dd, *3J*H-H = 8.6 Hz, *4J*H-F = 8.6 Hz, 1H), 6.82 – 6.77 (dd, *3J*H-H = 8.6 Hz, *4J*H-H = 2.4 Hz, 1H), 6.76 – 6.70 (dd, *3J*H-F = 12.1 Hz, *4J*H-H = 2.4 Hz, 1H), 4.03 – 3.94 (t, *3J*H-H = 6.5 Hz, 2H), 1.86 – 1.74 (m, 2H, overlap), 1.50 – 1.24 (m, 12H, overlap), 0.93 – 0.84 (t, *3J*H-H = 6.9 Hz, 3H). IR (KBr, pellet, cm-1): 2956, 2920, 2855, 1702, 1625, 1563, 1523, 1491, 1472, 1420, 1386, 1293, 1257, 1166, 1111, 1042, 1005, 833, 784. EI-MS m/z (rel. int.): 360.07 (M+, 18), 234 (100), 205.01 (3), 188.01 (4).

**10PF(2)PF(2)CHO:** White solid, yield 91%. 1H-NMR (400 MHz, CDCl3, TMS) δ (ppm) = 10.01 (s, 1H), 7.76 – 7.69 (dd, *3J*H-H = 7.8 Hz, *4J*H-H = 1.6 Hz, 1H), 7.69 – 7.62 (dd, *3J*H-F = 9.7 Hz, *4J*H-H = 1.4 Hz, 1H), 7.60 – 7.51 (dd, *3J*H-H = 7.4 Hz, *4J*H-F = 7.4 Hz, 1H), 7.36 – 7.26 (dd, *3J*H-H = 8.6 Hz, *4J*H-F = 8.6 Hz, 1H), 6.82 – 6.77 (dd, *3J*H-H = 8.6 Hz, *4J*H-H = 2.4 Hz, 1H), 6.76 – 6.70 (dd, *3J*H-F = 12.1 Hz, *4J*H-H = 2.5 Hz, 1H), 4.03 – 3.94 (t, *3J*H-H = 6.5 Hz, 2H), 1.86 – 1.74 (m, 2H, overlap), 1.51 – 1.23 (m, 14H, overlap), 0.92 – 0.84 (t, *3J*H-H = 6.9 Hz, 3H). IR (KBr, pellet, cm-1): 2963, 2917, 2852, 1698, 1626, 1568, 1523, 1492, 1470, 1421, 1382, 1292, 1275, 1165, 1129, 1050, 1007, 840, 784. EI-MS m/z (rel. int.): 374.09 (M+, 10), 234.01 (100), 205.01 (3), 188.01 (4).

***Spectroscopic data for Schiff base compounds (nPF(2)PF(2)Sx)***

**2PF(2)PF(2)SH:** Yellow solid, yield 91%. 1H-NMR (400 MHz, DMSO, TMS) δ (ppm) = 9.04 (s, 1H), 8.73 (s, 1H), 8.06 – 7.98 (dd, *3J*H-F = 11.2 Hz, *4J*H-H = 1.4 Hz, 1H), 7.86 – 7.79 (dd, *3J*H-H = 7.9 Hz, *4J*H-H = 1.3 Hz, 1H), 7.53 – 7.44 (dd, *3J*H-H = 7.7 Hz, *4J*H-F = 7.7 Hz, 1H), 7.39 – 7.30 (dd, *3J*H-H = 8.7 Hz, *4J*H-F = 8.7 Hz, 1H), 7.26 – 7.19 (dd, *3J*H-H = 7.9 Hz, *4J*H-H = 1.5 Hz, 1H), 7.10 – 7.02 (ddd, *3J*H-H = 7.4 Hz, *3J*H-H = 7.4 Hz, *4J*H-H = 1.5 Hz, 1H), 6.94 – 6.75 (m, 4H, overlap), 4.07 – 4.00 (q, *3J*H-H = 6.9 Hz, 2H), 1.33 – 1.24 (t, *3J*H-H = 6.9 Hz, 3H). IR (KBr, pellet, cm-1): 3310, 2984, 2917,.1622, 1556, 1524, 1485, 1416, 1378, 1291, 1243, 1165, 1132, 1113, 1044, 890, 851, 802. EI-MS m/z (rel. int.): 353.09 (M+, 31), 323.03 (6), 206.04 (8), 120.01 (100). EA, Calc. for C21H17F2NO2: C, 71.38; H, 4.85; N, 3.96. Found: C, 71.23; H, 4.90; N, 3.98.

**3PF(2)PF(2)SH:** Yellow solid, yield 89%. 1H-NMR (400 MHz, DMSO, TMS) δ (ppm) = 9.05 (s, 1H), 8.80 (s, 1H), 8.11 – 8.03 (dd, *3J*H-F = 11.2 Hz, *4J*H-H = 1.2 Hz, 1H), 7.93 – 7.86 (dd, *3J*H-H = 8.0 Hz, *4J*H-H = 1.3 Hz, 1H), 7.59 – 7.51 (dd, *3J*H-H = 7.7 Hz, *4J*H-F = 7.7 Hz, 1H), 7.46 – 7.36 (dd, *3J*H-H = 8.7 Hz, *4J*H-F = 8.7 Hz, 1H), 7.32 – 7.25 (dd, *3J*H-H = 7.9 Hz, *4J*H-H = 1.4 Hz, 1H), 7.17 – 7.07 (ddd, *3J*H-H = 7.4 Hz, *3J*H-H = 7.4 Hz, *4J*H-H = 1.5 Hz, 1H), 7.01 – 6.82 (m, 4H, overlap), 4.05 – 3.97 (t, *3J*H-H = 6.5 Hz, 2H), 1.83 – 1.69 (m, 2H, overlap), 1.06 – 0.93 (t, *3J*H-H = 7.3 Hz, 3H). IR (KBr, pellet, cm-1): 3313, 2969, 2928, 1623, 1557, 1525, 1492, 1417, 1385, 1288, 1245, 1171, 1151, 1106, 990, 948, 831, 814. EI-MS m/z (rel. int.): 367.16 (M+, 31), 324.1 (12), 206.07 (10), 120.01 (100). EA, Calc. for C22H19F2NO2: C, 71.92; H, 5.21; N, 3.81. Found: C, 72.12; H, 5.42; N, 3.68.

**4PF(2)PF(2)SH:** Yellow solid, yield 89%. 1H-NMR (400 MHz, DMSO, TMS) δ (ppm) = 9.04 (s, 1H), 8.78 (s, 1H), 8.09 – 8.01 (dd, *3J*H-F = 11.2 Hz, *4J*H-H = 1.4 Hz, 1H), 7.91 – 7.84 (dd, *3J*H-H = 8.0 Hz, *4J*H-H = 1.5 Hz, 1H), 7.59 – 7.49 (dd, *3J*H-H = 7.7 Hz, *4J*H-F = 7.7 Hz, 1H), 7.45 – 7.34 (dd, *3J*H-H = 8.7 Hz, *4J*H-F = 8.7 Hz, 1H), 7.31 – 7.23 (dd, *3J*H-H = 7.9 Hz, *4J*H-H = 1.6 Hz, 1H), 7.15 – 7.07 (ddd, *3J*H-H = 7.3 Hz, *3J*H-H = 7.3 Hz, *4J*H-H = 1.6 Hz, 1H), 6.99 – 6.80 (m, 4H, overlap), 4.09 – 3.99 (t, *3J*H-H = 6.4 Hz, 2H), 1.75 – 1.66 (m, 2H, overlap), 1.51 – 1.36 (m, 2H, overlap), 0.99 – 0.89 (t, *3J*H-H = 7.4 Hz, 3H). IR (KBr, pellet, cm-1): 3314, 2963, 2872, 1621, 1557, 1525, 1476, 1419, 1378, 1288, 1238, 1165, 1116, 1044, 1001, 890, 860, 804. EI-MS m/z (rel. int.): 381.16 (M+, 18), 324.08 (11), 206.07 (8), 120.01 (100). EA, Calc. for C23H21F2NO2: C, 72.43; H, 5.55; N, 3.67. Found: C, 72.46; H, 5.57; N, 3.65.

**5PF(2)PF(2)SH:** Yellow solid, yield 88%. 1H-NMR (400 MHz, DMSO, TMS) δ (ppm) = 9.05 (s, 1H), 8.80 (s, 1H), 8.11 – 8.03 (dd, *3J*H-F = 11.1 Hz, *4J*H-H = 1.4 Hz, 1H), 7.93 – 7.86 (dd, *3J*H-H = 7.9 Hz, *4J*H-H = 1.5 Hz, 1H), 7.60 – 7.51 (dd, *3J*H-H = 7.7 Hz, *4J*H-F = 7.7 Hz, 1H), 7.45 – 7.36 (dd, *3J*H-H = 8.7 Hz, *4J*H-F = 8.7 Hz, 1H), 7.32 – 7.25 (dd, *3J*H-H = 7.9 Hz, *4J*H-H = 1.6 Hz, 1H), 7.17 – 7.08 (ddd, *3J*H-H = 7.3 Hz, *3J*H-H = 7.3 Hz, *4J*H-H = 1.6 Hz, 1H), 7.01 – 6.82 (m, 4H, overlap), 4.08 – 4.00 (t, *3J*H-H = 6.4 Hz, 2H), 1.80 – 1.68 (m, 2H, overlap), 1.46 – 1.31 (m, 4H, overlap), 0.95 – 0.87 (t, *3J*H-H = 6.9 Hz, 3H). IR (KBr, pellet, cm-1): 3321, 2935, 2869, 1622, 1557, 1524, 1483, 1418, 1380, 1289, 1239, 1166, 1115, 1030, 1003, 891, 855, 809. EI-MS m/z (rel. int.): 395.18 (M+, 18), 324.09 (13), 206.06 (8), 120.01 (100). EA, Calc. for C24H23F2NO2: C, 72.90; H, 5.86; N, 3.54. Found: C, 72.82; H, 5.74; N, 3.52.

**6PF(2)PF(2)SH:** Yellow solid, yield 76%. 1H-NMR (400 MHz, DMSO, TMS) δ (ppm) = 9.06 (s, 1H), 8.76 (s, 1H), 8.11 – 8.04 (dd, *3J*H-F = 11.2 Hz, *4J*H-H = 1.4 Hz, 1H), 7.93 – 7.86 (dd, *3J*H-H = 8.0 Hz, *4J*H-H = 1.5 Hz, 1H), 7.60 – 7.51 (dd, *3J*H-H = 7.7 Hz, *4J*H-F = 7.7 Hz, 1H), 7.46 – 7.36 (dd, *3J*H-H = 8.7 Hz, *4J*H-F = 8.7 Hz, 1H), 7.33 – 7.26 (dd, *3J*H-H = 8.0 Hz, *4J*H-H = 1.6 Hz, 1H), 7.17 – 7.07 (ddd, *3J*H-H = 7.4 Hz, *3J*H-H = 7.4 Hz, *4J*H-H = 1.6 Hz, 1H), 7.01 – 6.82 (m, 4H, overlap), 4.08 – 4.02 (t, *3J*H-H = 6.5 Hz, 2H), 1.80 – 1.65 (m, 2H, overlap), 1.47 – 1.30 (m, 6H, overlap), 0.93 – 0.85 (t, *3J*H-H = 6.9 Hz, 3H). IR (KBr, pellet, cm-1): 3326, 2933, 2855, 1622, 1556, 1523, 1489, 1418, 1378, 1288, 1239, 1162, 1115, 1032, 1004, 889, 845, 812. EI-MS m/z (rel. int.): 409.19 (M+, 15), 324.08 (11), 206.06 (7), 120.02 (100). EA, Calc. for C25H25F2NO2: C, 73.33; H, 6.15; N, 3.42. Found: C, 72.71; H, 6.21; N, 3.34.

**7PF(2)PF(2)SH:** Yellow solid, yield 82%. 1H-NMR (400 MHz, DMSO, TMS) δ (ppm) = 9.06 (s, 1H), 8.76 (s, 1H), 8.08 – 8.00 (dd, *3J*H-F = 11.2 Hz, *4J*H-H = 1.4 Hz, 1H), 7.88 – 7.79 (dd, *3J*H-H = 8.0 Hz, *4J*H-H = 1.5 Hz, 1H), 7.55 – 7.46 (dd, *3J*H-H = 7.7 Hz, *4J*H-F = 7.7 Hz, 1H), 7.41 – 7.31 (dd, *3J*H-H = 8.7 Hz, *4J*H-F = 8.7 Hz, 1H), 7.28 – 7.21 (dd, *3J*H-H = 8.0 Hz, *4J*H-H = 1.6 Hz, 1H), 7.13 – 7.04 (ddd, *3J*H-H = 7.4 Hz, *3J*H-H = 7.4 Hz, *4J*H-H = 1.5 Hz, 1H), 6.97 – 6.77 (m, 4H, overlap), 4.02 – 3.94 (t, *3J*H-H = 6.5 Hz, 2H), 1.73 – 1.62 (m, 2H, overlap), 1.41 – 1.21 (m, 8H, overlap), 0.87 – 0.78 (t, *3J*H-H = 6.9 Hz, 3H). IR (KBr, pellet, cm-1): 3328, 2935, 2854, 1622, 1557, 1523, 1474, 1418, 1377, 1288, 1240, 1163, 1114 1038, 1004, 890, 846, 811. EI-MS m/z (rel. int.): 423.21 (M+, 15), 324.09 (13), 206.06 (7), 120.03 (100). EA, Calc. for C26H27F2NO2: C, 73.74; H, 6.43; N, 3.31. Found: C, 73.69; H, 6.51; N, 3.33.

**8PF(2)PF(2)SH:** Yellow solid, yield 88%. 1H-NMR (400 MHz, DMSO, TMS) δ (ppm) = 9.05 (s, 1H), 8.80 (s, 1H), 8.11 – 8.04 (dd, *3J*H-F = 11.2 Hz, *4J*H-H = 1.4 Hz, 1H), 7.93 – 7.86 (dd, *3J*H-H = 8.0 Hz, *4J*H-H = 1.5 Hz, 1H), 7.59 – 7.50 (dd, *3J*H-H = 7.7 Hz, *4J*H-F = 7.7 Hz, 1H), 7.45 – 7.36 (dd, *3J*H-H = 8.7 Hz, *4J*H-F = 8.7 Hz, 1H), 7.33 – 7.26 (dd, *3J*H-H = 8.0 Hz, *4J*H-H = 1.6 Hz, 1H), 7.17 – 7.08 (ddd, *3J*H-H = 7.4 Hz, *3J*H-H = 7.4 Hz, *4J*H-H = 1.6 Hz, 1H), 7.00 – 6.82 (m, 4H, overlap), 4.08 – 3.97 (t, *3J*H-H = 6.5 Hz, 2H), 1.79 – 1.67 (m, 2H, overlap), 1.46 – 1.25 (m, 10H, overlap), 0.91 – 0.83 (t, *3J*H-H = 6.9 Hz, 3H). IR (KBr, pellet, cm-1): 3313, 2954, 2852, 1623, 1557, 1524, 1474, 1418, 1377, 1286, 1241, 1164, 1115, 1030, 1001, 891, 850, 812. EI-MS m/z (rel. int.): 437.23 (M+, 16), 324.09 (14), 206.07 (7), 120.03 (100). EA, Calc. for C27H29F2NO2: C, 74.12; H, 6.68; N, 3.20. Found: C, 74.11; H, 6.52; N, 3.12.

**9PF(2)PF(2)SH:** Yellow solid, yield 80%. 1H-NMR (400 MHz, DMSO, TMS) δ (ppm) = 9.06 (s, 1H), 8.81 (s, 1H), 8.14 – 8.04 (dd, *3J*H-F = 11.1 Hz, *4J*H-H = 1.3 Hz, 1H), 7.95 – 7.86 (dd, *3J*H-H = 7.9 Hz, *4J*H-H = 1.4 Hz, 1H), 7.60 – 7.51 (dd, *3J*H-H = 7.7 Hz, *4J*H-F = 7.7 Hz, 1H), 7.48 – 7.37 (dd, *3J*H-H = 8.7 Hz, *4J*H-F = 8.7 Hz, 1H), 7.35 – 7.26 (dd, *3J*H-H = 7.9 Hz, *4J*H-H = 1.4 Hz, 1H), 7.18 – 7.09 (ddd, *3J*H-H = 7.4 Hz, *3J*H-H = 7.4 Hz, *4J*H-H = 1.5 Hz, 1H), 7.01 – 6.82 (m, 4H, overlap), 4.09 – 3.98 (t, *3J*H-H = 6.5 Hz, 2H), 1.80 – 1.68 (m, 2H, overlap), 1.47 – 1.25 (m, 12H, overlap), 0.91 – 0.83 (t, *3J*H-H = 6.9 Hz, 3H). IR (KBr, pellet, cm-1): 3323, 2924, 2853, 1622, 1557, 1523, 1473, 1418, 1376, 1291, 1239, 1162, 1115, 1029, 1003, 890, 846, 810. EI-MS m/z (rel. int.): 451.27 (M+, 15), 324.11 (16), 207.04 (21), 120.05 (100). EA, Calc. for C28H31F2NO2: C, 74.48; H, 6.92; N, 3.10. Found: C, 74.31; H, 6.75; N, 3.08.

**10PF(2)PF(2)SH:** Yellow solid, yield 84%. 1H-NMR (400 MHz, DMSO, TMS) δ (ppm) = 9.06 (s, 1H), 8.82 (s, 1H), 8.12 – 8.04 (dd, *3J*H-F = 11.2 Hz, *4J*H-H = 1.1 Hz, 1H), 7.94 – 7.87 (dd, *3J*H-H = 8.0 Hz, *4J*H-H = 1.2 Hz, 1H), 7.61 – 7.52 (dd, *3J*H-H = 7.7 Hz, *4J*H-F = 7.7 Hz, 1H), 7.47 – 7.38 (dd, *3J*H-H = 8.7 Hz, *4J*H-F = 8.7 Hz, 1H), 7.34 – 7.27 (dd, *3J*H-H = 7.9 Hz, *4J*H-H = 1.3 Hz, 1H), 7.18 – 7.10 (ddd, *3J*H-H = 7.4 Hz, *3J*H-H = 7.4 Hz, *4J*H-H = 1.5 Hz, 1H), 7.02 – 6.83 (m, 4H, overlap), 4.10 – 4.01 (t, *3J*H-H = 6.5 Hz, 2H), 1.81 – 1.70 (m, 2H, overlap), 1.48 – 1.25 (m, 14H, overlap), 0.92 – 0.83 (t, *3J*H-H = 6.8 Hz, 3H). IR (KBr, pellet, cm-1): 3328, 2925, 2853, 1623, 1557, 1523, 1474, 1418, 1376, 1289, 1239, 1161, 1115, 1029, 1004, 890, 847, 811. EI-MS m/z (rel. int.): 465.28 (M+, 14), 324.1 (15), 207.04 (15), 120.06 (100). EA, Calc. for C29H33F2NO2: C, 74.81; H, 7.14; N, 3.01. Found: C, 75.00; H, 7.01; N, 3.02.

**2PF(2)PF(2)SM:** Yellow solid, yield 84%. 1H-NMR (400 MHz, DMSO, TMS) δ (ppm) = 8.84 (s, 1H), 8.81 (s, 1H), 8.14 – 8.06 (dd, *3J*H-F = 11.2 Hz, *4J*H-H = 1.4 Hz, 1H), 7.99 – 7.90 (dd, *3J*H-H = 8.0 Hz, *4J*H-H = 1.5 Hz, 1H), 7.64 – 7.55 (dd, *3J*H-H = 7.7 Hz, *4J*H-F = 7.7 Hz, 1H), 7.50 – 7.41 (dd, *3J*H-H = 8.6 Hz, *4J*H-F = 8.6 Hz, 1H), 7.16 (s, 1H), 7.04 – 6.92 (m, 3H, overlap), 6.90 – 6.83 (d, *3J*H-H = 8.2 Hz, 1H), 4.22 – 4.11 (q, *3J*H-H = 6.9 Hz, 2H), 2.31 (s, 3H), 1.45 – 1.36 (t, *3J*H-H = 7.0 Hz, 3H). IR (KBr, pellet, cm-1): 3328, 2986, 2918, 2867, 1621, 1574, 1556, 1504, 1473, 1417, 1394, 1280, 1246, 1167, 1128, 1042, 976, 886, 815. EI-MS m/z (rel. int.): 367.16 (M+, 47), 338.11 (5), 206.07 (8), 134.02 (100). EA, Calc. for C22H19F2NO2: C, 71.92; H, 5.21; N, 3.81. Found: C, 71.92; H, 5.23; N, 3.82.

**3PF(2)PF(2)SM:** Yellow solid, yield 79%. 1H-NMR (400 MHz, DMSO, TMS) δ (ppm) = 8.84 (s, 1H), 8.81 (s, 1H), 8.14 – 8.06 (dd, *3J*H-F = 11.1 Hz, *4J*H-H = 1.4 Hz, 1H), 7.97 – 7.90 (dd, *3J*H-H = 7.9 Hz, *4J*H-H = 1.5 Hz, 1H), 7.64 – 7.55 (dd, *3J*H-H = 7.6 Hz, *4J*H-F = 7.6 Hz, 1H), 7.50 – 7.41 (dd, *3J*H-H = 8.6 Hz, *4J*H-F = 8.6 Hz, 1H), 7.16 (s, 1H), 7.05 – 6.93 (m, 3H, overlap), 6.90 – 6.83 (d, *3J*H-H = 8.2 Hz, 1H), 4.10 – 4.02 (t, *3J*H-H = 6.5 Hz, 2H), 2.31 (s, 3H), 1.86 – 1.76 (m, 2H, overlap), 1.09 – 1.01 (t, *3J*H-H = 7.4 Hz, 3H). IR (KBr, pellet, cm-1): 3338, 2963, 2922, 2874, 1622, 1556, 1526, 1500, 1472, 1418, 1375, 1287, 1240, 1166, 1116, 992, 939, 887, 817. EI-MS m/z (rel. int.): 381.16 (M+, 33), 338.1 (9), 206.06 (8), 134.02 (100). EA, Calc. for C23H21F2NO2: C, 72.43; H, 5.55; N, 3.67. Found: C, 72.50; H, 5.75; N, 3.68.

**4PF(2)PF(2)SM:** Yellow solid, yield 79%. 1H-NMR (400 MHz, DMSO, TMS) δ (ppm) = 8.75 (s, 1H), 8.72 (s, 1H), 8.05 – 7.97 (dd, *3J*H-F = 11.2 Hz, *4J*H-H = 1.4 Hz, 1H), 7.88 – 7.80 (dd, *3J*H-H = 8.0 Hz, *4J*H-H = 1.5 Hz, 1H), 7.54 – 7.45 (dd, *3J*H-H = 7.7 Hz, *4J*H-F = 7.7 Hz, 1H), 7.41 – 7.31 (dd, *3J*H-H = 8.7 Hz, *4J*H-F = 8.7 Hz, 1H), 7.07 (s, 1H), 6.95 – 6.83 (m, 3H, overlap), 6.81 – 6.73 (d, *3J*H-H = 8.1 Hz, 1H), 4.04 – 3.97 (t, *3J*H-H = 6.5 Hz, 2H), 2.21 (s, 3H), 1.74 – 1.63 (m, 2H, overlap), 1.49 – 1.34 (m, 2H, overlap), 0.95 – 0.87 (t, *3J*H-H = 7.4 Hz, 3H). IR (KBr, pellet, cm-1): 3335, 2957, 2930, 2869, 1622, 1557, 1525, 1500, 1475, 1420, 1377, 1288, 1242, 1165, 1116, 1042, 1001, 889, 814. EI-MS m/z (rel. int.): 395.18 (M+, 29), 338.1 (10), 206.06 (7), 134.03 (100). EA, Calc. for C24H23F2NO2: C, 72.90; H, 5.86; N, 3.54. Found: C, 72.55; H, 5.79; N, 3.50.

**5PF(2)PF(2)SM:** Yellow solid, yield 89%. 1H-NMR (400 MHz, DMSO, TMS) δ (ppm) = 8.84 (s, 1H), 8.82 (s, 1H), 8.14 – 8.07 (dd, *3J*H-F = 11.2 Hz, *4J*H-H = 1.1 Hz, 1H), 7.97 – 7.90 (dd, *3J*H-H = 7.9 Hz, *4J*H-H = 1.3 Hz, 1H), 7.64 – 7.55 (dd, *3J*H-H = 7.7 Hz, *4J*H-F = 7.7 Hz, 1H), 7.50 – 7.41 (dd, *3J*H-H = 8.7 Hz, *4J*H-F = 8.7 Hz, 1H), 7.16 (s, 1H), 7.05 – 6.93 (m, 3H, overlap), 6.90 – 6.83 (d, *3J*H-H = 8.2 Hz, 1H), 4.14 – 4.05 (t, *3J*H-H = 6.5 Hz, 2H), 2.31 (s, 3H), 1.84 – 1.75 (m, 2H, overlap), 1.53 – 1.36 (m, 4H, overlap), 1.01 – 0.92 (t, *3J*H-H = 7.1 Hz, 3H). IR (KBr, pellet, cm-1): 3328, 2962, 2929, 2867, 1623, 1556, 1525, 1500, 1474, 1419, 1380, 1292, 1242, 1165, 1116, 1030, 1002, 889, 815. EI-MS m/z (rel. int.): 409.19 (M+, 23), 338.09 (9), 206.06 (6), 134.03 (100). EA, Calc. for C25H25F2NO2: C, 73.33; H, 6.15; N, 3.42. Found: C, 73.31; H, 6.01; N, 3.38.

**6PF(2)PF(2)SM:** Yellow solid, yield 58%. 1H-NMR (400 MHz, DMSO, TMS) δ (ppm) = 8.84 (s, 1H), 8.81 (s, 1H), 8.14 – 8.07 (dd, *3J*H-F = 11.2 Hz, *4J*H-H = 1.1 Hz, 1H), 7.97 – 7.90 (dd, *3J*H-H = 7.9 Hz, *4J*H-H = 1.0 Hz, 1H), 7.64 – 7.55 (dd, *3J*H-H = 7.7 Hz, *4J*H-F = 7.7 Hz, 1H), 7.50 – 7.41 (dd, *3J*H-H = 8.7 Hz, *4J*H-F = 8.7 Hz, 1H), 7.14 (s, 1H), 7.04 – 6.92 (m, 3H, overlap), 6.90 – 6.83 (d, *3J*H-H = 8.2 Hz, 1H), 4.12 – 4.06 (t, *3J*H-H = 6.5 Hz, 2H), 2.31 (s, 3H), 1.85 – 1.73 (m, 2H, overlap), 1.53 – 1.32 (m, 6H, overlap), 0.99 – 0.90 (t, *3J*H-H = 6.8 Hz, 3H). IR (KBr, pellet, cm-1): 3350, 2953, 2938, 2868, 1623, 1556, 1524, 1503, 1477, 1417, 1382, 1288, 1245, 1166, 1102, 1036, 997, 959, 815. EI-MS m/z (rel. int.): 423.21 (M+, 19), 338.11 (10), 206.07 (6), 134.05 (100). EA, Calc. for C26H27F2NO2: C, 73.74; H, 6.43; N, 3.31. Found: C, 73.60; H, 6.50; N, 3.26.

**7PF(2)PF(2)SM:** Yellow solid, yield 56%. 1H-NMR (400 MHz, DMSO, TMS) δ (ppm) = 8.84 (s, 1H), 8.82 (s, 1H), 8.14 – 8.07 (dd, *3J*H-F = 11.1 Hz, *4J*H-H = 1.1 Hz, 1H), 7.97 – 7.90 (dd, *3J*H-H = 7.9 Hz, *4J*H-H = 1.1 Hz, 1H), 7.64 – 7.55 (dd, *3J*H-H = 7.7 Hz, *4J*H-F = 7.7 Hz, 1H), 7.50 – 7.41 (dd, *3J*H-H = 8.6 Hz, *4J*H-F = 8.6 Hz, 1H), 7.17 (s, 1H), 7.04 – 6.93 (m, 3H, overlap), 6.90 – 6.83 (d, *3J*H-H = 8.2 Hz, 1H), 4.14 – 4.05 (t, *3J*H-H = 6.4 Hz, 2H), 2.31 (s, 3H), 1.85 – 1.73 (m, 2H, overlap), 1.52 – 1.31 (m, 8H, overlap), 0.97 – 0.89 (t, *3J*H-H = 6.7 Hz, 3H). IR (KBr, pellet, cm-1): 3345, 2956, 2934, 2854, 1624, 1556, 1525, 1504, 1477, 1416, 1384, 1289, 1246, 1167, 1103, 1043, 1005, 887, 816. EI-MS m/z (rel. int.): 437.24 (M+, 21), 338.11 (11), 206.07 (6), 134.06 (100). EA, Calc. for C27H29F2NO2: C, 74.12; H, 6.68; N, 3.20. Found: C, 74.12; H, 6.76; N, 3.26.

**8PF(2)PF(2)SM:** Yellow solid, yield 87%. 1H-NMR (400 MHz, DMSO, TMS) δ (ppm) = 8.84 (s, 1H), 8.81 (s, 1H), 8.14 – 8.07 (dd, *3J*H-F = 11.1 Hz, *4J*H-H = 1.1 Hz, 1H), 7.97 – 7.90 (dd, *3J*H-H = 7.9 Hz, *4J*H-H = 1.0 Hz, 1H), 7.64 – 7.55 (dd, *3J*H-H = 7.7 Hz, *4J*H-F = 7.7 Hz, 1H), 7.50 – 7.41 (dd, *3J*H-H = 8.6 Hz, *4J*H-F = 8.6 Hz, 1H), 7.17 (s, 1H), 7.04 – 6.92 (m, 3H, overlap), 6.90 – 6.83 (d, *3J*H-H = 8.2 Hz, 1H), 4.14 – 4.05 (t, *3J*H-H = 6.5 Hz, 2H), 2.31 (s, 3H), 1.83 – 1.73 (m, 2H, overlap), 1.52 – 1.30 (m, 10H, overlap), 0.97 – 0.88 (t, *3J*H-H = 6.5 Hz, 3H). IR (KBr, pellet, cm-1): 3338, 2955, 2919, 2851, 1623, 1556, 1524, 1501, 1474, 1418, 1377, 1286, 1242, 1163, 1132, 1113, 1001, 852, 817. EI-MS m/z (rel. int.): 451.26 (M+, 22), 338.11 (11), 206.07 (6), 134.05 (100). EA, Calc. for C28H31F2NO2: C, 74.48; H, 6.92; N, 3.10. Found: C, 74.48; H, 6.75; N, 3.10.

**9PF(2)PF(2)SM:** Yellow solid, yield 78%. 1H-NMR (400 MHz, DMSO, TMS) δ (ppm) = 8.85 (s, 1H), 8.82 (s, 1H), 8.15 – 8.08 (dd, *3J*H-F = 11.2 Hz, *4J*H-H = 1.1 Hz, 1H), 7.98 – 7.91 (dd, *3J*H-H = 7.9 Hz, *4J*H-H = 1.1 Hz, 1H), 7.65 – 7.56 (dd, *3J*H-H = 7.7 Hz, *4J*H-F = 7.7 Hz, 1H), 7.51 – 7.42 (dd, *3J*H-H = 8.6 Hz, *4J*H-F = 8.6 Hz, 1H), 7.18 (s, 1H), 7.06 – 6.94 (m, 3H, overlap), 6.91 – 6.84 (d, *3J*H-H = 8.2 Hz, 1H), 4.15 – 4.04 (t, *3J*H-H = 6.5 Hz, 2H), 2.32 (s, 3H), 1.86 – 1.74 (m, 2H, overlap), 1.53 – 1.30 (m, 12H, overlap), 0.97 – 0.89 (t, *3J*H-H = 6.7 Hz, 3H). IR (KBr, pellet, cm-1): 3337, 2956, 2918, 2851, 1624, 1556, 1525, 1500, 1474, 1418, 1377, 1287, 1242, 1164, 1133, 1114, 1003, 853, 816. EI-MS m/z (rel. int.): 465.28 (M+, 22), 338.12 (13), 206.07 (7), 134.06 (100). EA, Calc. for C29H33F2NO2: C, 74.81; H, 7.14; N, 3.01. Found: C, 74.72; H, 6.98; N, 2.99.

**10PF(2)PF(2)SM:** Yellow solid, yield 87%. 1H-NMR (400 MHz, DMSO, TMS) δ (ppm) = 8.85 (s, 1H), 8.82 (s, 1H), 8.15 – 8.07 (dd, *3J*H-F = 11.1 Hz, *4J*H-H = 1.3 Hz, 1H), 7.98 – 7.90 (dd, *3J*H-H = 8.0 Hz, *4J*H-H = 1.5 Hz, 1H), 7.64 – 7.55 (dd, *3J*H-H = 7.7 Hz, *4J*H-F = 7.7 Hz, 1H), 7.50 – 7.41 (dd, *3J*H-H = 8.6 Hz, *4J*H-F = 8.6 Hz, 1H), 7.17 (s, 1H), 7.05 – 6.92 (m, 3H, overlap), 6.90 – 6.83 (d, *3J*H-H = 8.1 Hz, 1H), 4.14 – 4.05 (t, *3J*H-H = 6.5 Hz, 2H), 2.31 (s, 3H), 1.83 – 1.73 (m, 2H, overlap), 1.52 – 1.29 (m, 14H, overlap), 0.96 – 0.88 (t, *3J*H-H = 6.7 Hz, 3H). IR (KBr, pellet, cm-1): 3336, 2953, 2920, 2852, 1624, 1556, 1525, 1500, 1473, 1418, 1377, 1287, 1242, 1164, 1132, 1114, 1003, 849, 815. EI-MS m/z (rel. int.): 479.28 (M+, 22), 338.11 (13), 206.08 (6), 134.06 (100). EA, Calc. for C30H35F2NO2: C, 75.13; H, 7.36; N, 2.92. Found: C, 75.16; H, 7.19; N, 2.94.

**2PF(2)PF(2)SN:** Yellow solid, yield 91%. 1H-NMR (400 MHz, DMSO, TMS) δ (ppm) = 10.01 (s, 1H), 8.86 (s, 1H), 8.12 –8.07 (d, *4J*H-H = 2.7 Hz, 1H), 8.04 – 7.96 (m, 2H, overlap), 7.94 – 7.87 (dd, *3J*H-H = 8.0 Hz, *4J*H-H = 1.3 Hz, 1H), 7.58 – 7.51 (dd, *3J*H-H = 7.7 Hz, *4J*H-F = 7.7 Hz, 1H), 7.42 – 7.33 (dd, *3J*H-H = 8.7 Hz, *4J*H-F = 8.7 Hz, 1H), 7.10 – 7.02 (d, *3J*H-H = 9.0 Hz, 1H), 6.94 – 6.85 (m, 2H, overlap), 4.13 – 4.06 (q, *3J*H-H = 6.9 Hz, 2H), 1.37 – 1.30 (t, *3J*H-H = 7.0 Hz, 3H). IR (KBr, pellet, cm-1): 3242, 2983, 2918, 2851, 1628, 1578, 1519, 1494, 1445, 1417, 1339, 1285, 1260, 1233, 1166, 1117, 1049, 981, 894, 831. EI-MS m/z (rel. int.): 398.15 (M+, 12), 368.05 (24), 207.04 (30), 165.03 (26). EA, Calc. for C21H16F2N2O4: C, 63.32; H, 4.05; N, 7.03. Found: C, 63.29; H, 4.22; N, 7.18.

**3PF(2)PF(2)SN:** Yellow solid, yield 90%. 1H-NMR (400 MHz, DMSO, TMS) δ (ppm) = 10.01 (s, 1H), 8.86 (s, 1H), 8.12 –8.07 (d, *4J*H-H = 2.7 Hz, 1H), 8.04 – 7.96 (m, 2H, overlap), 7.93 – 7.86 (dd, *3J*H-H = 7.9 Hz, *4J*H-H = 1.4 Hz, 1H), 7.57 – 7.51 (dd, *3J*H-H = 7.7 Hz, *4J*H-F = 7.7 Hz, 1H), 7.41 – 7.34 (dd, *3J*H-H = 8.7 Hz, *4J*H-F = 8.7 Hz, 1H), 7.09 – 7.02 (d, *3J*H-H = 9.0 Hz, 1H), 6.95 – 6.85 (m, 2H, overlap), 4.03 – 3.95 (t, *3J*H-H = 6.5 Hz, 2H), 1.79 – 1.68 (m, 2H, overlap), 1.02 –0.92 (t, *3J*H-H = 7.4 Hz, 3H). IR (KBr, pellet, cm-1): 3248, 2974, 2916, 2851, 1630, 1578, 1519, 1494, 1445, 1417, 1339, 1288, 1260, 1234, 1166, 1109, 992, 949, 894, 828. EI-MS m/z (rel. int.): 412.08 (M+, 25), 369.04 (22), 207.02 (100), 165 (51). EA, Calc. for C22H18F2N2O4: C, 64.08; H, 4.40; N, 6.79. Found: C, 64.18; H, 4.50; N, 6.89.

**4PF(2)PF(2)SN:** Yellow solid, yield 87%. 1H-NMR (400 MHz, DMSO, TMS) δ (ppm) = 10.01 (s, 1H), 8.85 (s, 1H), 8.12 –8.07 (d, *4J*H-H = 2.7 Hz, 1H), 8.04 – 7.96 (m, 2H, overlap), 7.93 – 7.86 (dd, *3J*H-H = 7.8 Hz, *4J*H-H = 1.4 Hz, 1H), 7.58 – 7.49 (dd, *3J*H-H = 7.6 Hz, *4J*H-F = 7.6 Hz, 1H), 7.42 – 7.32 (dd, *3J*H-H = 8.7 Hz, *4J*H-F = 8.7 Hz, 1H), 7.12 – 7.02 (d, *3J*H-H = 9.0 Hz, 1H), 6.95 – 6.84 (m, 2H, overlap), 4.07 – 3.99 (t, *3J*H-H = 6.4 Hz, 2H), 1.74 – 1.65 (m, 2H, overlap), 1.50 – 1.38 (m, 2H, overlap), 0.97 –0.88 (t, *3J*H-H = 7.4 Hz, 3H). IR (KBr, pellet, cm-1): 3276, 2960, 2937, 2879, 1629, 1578, 1516, 1493, 1443, 1416, 1339, 1288, 1259, 1233, 1164, 1108, 987, 950, 896, 826. MS (MALDI-TOF) m/z calcd for C23H20F2N2O4: 426.42. Found: 427.2. EA, Calc. for C23H20F2N2O4: C, 64.78; H, 4.73; N, 6.57. Found: C, 64.87; H, 4.69; N, 6.60.

**5PF(2)PF(2)SN:** Yellow solid, yield 53%. 1H-NMR (400 MHz, DMSO, TMS) δ (ppm) = 10.01 (s, 1H), 8.86 (s, 1H), 8.12 –8.07 (d, *4J*H-H = 2.7 Hz, 1H), 8.04 – 7.96 (m, 2H, overlap), 7.94 – 7.87 (dd, *3J*H-H = 7.9 Hz, *4J*H-H = 1.4 Hz, 1H), 7.58 – 7.50 (dd, *3J*H-H = 7.7 Hz, *4J*H-F = 7.7 Hz, 1H), 7.41 – 7.34 (dd, *3J*H-H = 8.6 Hz, *4J*H-F = 8.6 Hz, 1H), 7.10 – 7.03 (d, *3J*H-H = 8.9 Hz, 1H), 6.95 – 6.86 (m, 2H, overlap), 4.07 – 3.99 (t, *3J*H-H = 6.5 Hz, 2H), 1.78 – 1.64 (m, 2H, overlap), 1.44 – 1.29 (m, 4H, overlap), 0.93 –0.84 (t, *3J*H-H = 7.0 Hz, 3H). IR (KBr, pellet, cm-1): 3245, 2959, 2919, 2848, 1629, 1578, 1519, 1491, 1457, 1418, 1338, 1284, 1259, 1166, 1119, 1034, 981, 893, 829. MS (MALDI-TOF) m/z calcd for C24H22F2N2O4: 440.45. Found: 441.2. EA, Calc. for C24H22F2N2O4: C, 65.45; H, 5.03; N, 6.36. Found: C, 65.30; H, 5.18; N, 6.35.

**6PF(2)PF(2)SN:** Yellow solid, yield 64%. 1H-NMR (400 MHz, DMSO, TMS) δ (ppm) = 10.01 (s, 1H), 8.87 (s, 1H), 8.12 –8.07 (d, *4J*H-H = 2.7 Hz, 1H), 8.04 – 7.96 (m, 2H, overlap), 7.93 – 7.86 (dd, *3J*H-H = 8.0 Hz, *4J*H-H = 1.3 Hz, 1H), 7.58 – 7.50 (dd, *3J*H-H = 7.7 Hz, *4J*H-F = 7.7 Hz, 1H), 7.42 – 7.33 (dd, *3J*H-H = 8.6 Hz, *4J*H-F = 8.6 Hz, 1H), 7.09 – 7.02 (d, *3J*H-H = 9.0 Hz, 1H), 6.95 – 6.85 (m, 2H, overlap), 4.07 – 3.98 (t, *3J*H-H = 6.5 Hz, 2H), 1.77 – 1.65 (m, 2H, overlap), 1.45 – 1.27 (m, 6H, overlap), 0.90 –0.82 (t, *3J*H-H = 7.1 Hz, 3H). IR (KBr, pellet, cm-1): 3257, 2962, 2919, 2856, 1627, 1579, 1519, 1493, 1444, 1419, 1340, 1284, 1261, 1169, 1111, 1040, 980, 959, 895, 828. MS (MALDI-TOF) m/z calcd for C25H24F2N2O4: 454.47. Found: 455.2. EA, Calc. for C25H24F2N2O4: C, 66.07; H, 5.32; N, 6.16. Found: C, 65.85; H, 5.47; N, 5.94.

**7PF(2)PF(2)SN:** Yellow solid, yield 40%. 1H-NMR (400 MHz, DMSO, TMS) δ (ppm) = 10.02 (s, 1H), 8.87 (s, 1H), 8.12 –8.07 (d, *4J*H-H = 2.7 Hz, 1H), 8.03 – 7.96 (m, 2H, overlap), 7.93 – 7.86 (dd, *3J*H-H = 7.9 Hz, *4J*H-H = 1.3 Hz, 1H), 7.58 – 7.50 (dd, *3J*H-H = 7.7 Hz, *4J*H-F = 7.7 Hz, 1H), 7.42 – 7.33 (dd, *3J*H-H = 8.6 Hz, *4J*H-F = 8.6 Hz, 1H), 7.09 – 7.02 (d, *3J*H-H = 9.0 Hz, 1H), 6.95 – 6.85 (m, 2H, overlap), 4.07 – 3.99 (t, *3J*H-H = 6.5 Hz, 2H), 1.78 – 1.66 (m, 2H, overlap), 1.46 – 1.25 (m, 8H, overlap), 0.89 –0.81 (t, *3J*H-H = 6.9 Hz, 3H). IR (KBr, pellet, cm-1): 3276, 2959, 2921, 2856, 1626, 1579, 1517, 1493, 1442, 1418, 1340, 1285, 1260, 1166, 1122, 1047, 979, 898, 829. MS (MALDI-TOF) m/z calcd for C26H26F2N2O4: 468.5. Found: 469.2. EA, Calc. for C26H26F2N2O4: C, 66.66; H, 5.59; N, 5.98. Found: C, 66.13; H, 5.57; N, 5.98.

**8PF(2)PF(2)SN:** Yellow solid, yield 85%. 1H-NMR (400 MHz, DMSO, TMS) δ (ppm) = 10.02 (s, 1H), 8.86 (s, 1H), 8.12 –8.07 (d, *4J*H-H = 2.8 Hz, 1H), 8.05 – 7.96 (m, 2H, overlap), 7.94 – 7.86 (dd, *3J*H-H = 7.9 Hz, *4J*H-H = 1.4 Hz, 1H), 7.57 – 7.51 (dd, *3J*H-H = 7.7 Hz, *4J*H-F = 7.7 Hz, 1H), 7.42 – 7.33 (dd, *3J*H-H = 8.5 Hz, *4J*H-F = 8.5 Hz, 1H), 7.10 – 7.03 (d, *3J*H-H = 9.0 Hz, 1H), 6.95 – 6.85 (m, 2H, overlap), 4.07 – 3.98 (t, *3J*H-H = 6.5 Hz, 2H), 1.77 – 1.65 (m, 2H, overlap), 1.45 – 1.23 (m, 10H, overlap), 0.88 –0.80 (t, *3J*H-H = 6.9 Hz, 3H). IR (KBr, pellet, cm-1): 3279, 2980, 2920, 2856, 1626, 1578, 1516, 1492, 1442, 1418, 1341, 1290, 1260, 1167, 1111, 1035, 1004, 901, 828. MS (MALDI-TOF) m/z calcd for C27H28F2N2O4: 482.53. Found: 483.2. EA, Calc. for C27H28F2N2O4: C, 67.21; H, 5.85; N, 5.81. Found: C, 67.33; H, 5.70; N, 5.89.

**9PF(2)PF(2)SN:** Yellow solid, yield 75%. 1H-NMR (400 MHz, DMSO, TMS) δ (ppm) = 10.02 (s, 1H), 8.86 (s, 1H), 8.12 –8.07 (d, *4J*H-H = 2.7 Hz, 1H), 8.04 – 7.96 (m, 2H, overlap), 7.94 – 7.87 (dd, *3J*H-H = 8.0 Hz, *4J*H-H = 1.5 Hz, 1H), 7.58 – 7.50 (dd, *3J*H-H = 7.7 Hz, *4J*H-F = 7.7 Hz, 1H), 7.42 – 7.33 (dd, *3J*H-H = 8.5 Hz, *4J*H-F = 8.5 Hz, 1H), 7.10 – 7.03 (d, *3J*H-H = 9.0 Hz, 1H), 6.95 – 6.85 (m, 2H, overlap), 4.07 – 3.98 (t, *3J*H-H = 6.5 Hz, 2H), 1.77 – 1.65 (m, 2H, overlap), 1.45 – 1.22 (m, 12H, overlap), 0.88 –0.80 (t, *3J*H-H = 6.9 Hz, 3H). IR (KBr, pellet, cm-1): 3267, 2959, 2935, 2854, 1626, 1578, 1519, 1493, 1443, 1418, 1339, 1287, 1260, 1165, 1122, 1043, 980, 896, 829. MS (MALDI-TOF) m/z calcd for C28H30F2N2O4: 496.55. Found: 497.3. EA, Calc. for C28H30F2N2O4: C, 67.73; H, 6.09; N, 5.64. Found: C, 67.74; H, 5.91; N, 5.78.

**10PF(2)PF(2)SN:** Yellow solid, yield 86%. 1H-NMR (400 MHz, DMSO, TMS) δ (ppm) = 10.01 (s, 1H), 8.88 (s, 1H), 8.15 –8.10 (d, *4J*H-H = 2.8 Hz, 1H), 8.06 – 7.98 (m, 2H, overlap), 7.94 – 7.87 (dd, *3J*H-H = 8.0 Hz, *4J*H-H = 1.4 Hz, 1H), 7.58 – 7.51 (dd, *3J*H-H = 7.7 Hz, *4J*H-F = 7.7 Hz, 1H), 7.41 – 7.34 (dd, *3J*H-H = 8.6 Hz, *4J*H-F = 8.6 Hz, 1H), 7.09 – 7.02 (d, *3J*H-H = 9.0 Hz, 1H), 6.98 – 6.84 (m, 2H, overlap), 4.04 – 3.96 (t, *3J*H-H = 6.5 Hz, 2H), 1.75 – 1.63 (m, 2H, overlap), 1.44 – 1.19 (m, 14H, overlap), 0.86 –0.78 (t, *3J*H-H = 6.9 Hz, 3H). IR (KBr, pellet, cm-1): 3260, 2959, 2920, 2855, 1627, 1578, 1519, 1492, 1445, 1418, 1339, 1288, 1260, 1165, 1109, 1034, 980, 896, 828. MS (MALDI-TOF) m/z calcd for C29H32F2N2O4: 510.58. Found: 511.3. EA, Calc. for C29H32F2N2O4: C, 68.22; H, 6.32; N, 5.49. Found: C, 68.36; H, 6.19; N, 5.58.

***Spectroscopic data for benzoxazole compounds (nPF(2)PF(2)Bx)***

**2PF(2)PF(2)BH:** White solid, yield 91%. 1H-NMR (400 MHz, CDCl3, TMS) δ (ppm) = 8.12 – 8.06 (dd, *3J*H-H = 8.0 Hz, *4J*H-H = 1.6 Hz, 1H), 8.06 – 8.00 (dd, *3J*H-F = 10.4 Hz, *4J*H-H = 1.5 Hz, 1H), 7.83 – 7.76 (m, 1H), 7.64 – 7.57 (m, 1H), 7.57 – 7.50 (dd, *3J*H-H = 7.7 Hz, *4J*H-F = 7.7 Hz, 1H), 7.42 – 7.30 (m, 3H, overlap), 6.82 – 6.77 (dd, *3J*H-H = 8.6 Hz, *4J*H-H = 2.4 Hz, 1H), 6.77 – 6.71 (dd, *3J*H-F = 12.0 Hz, *4J*H-H = 2.4 Hz, 1H), 4.11 – 4.00 (q, *3J*H-H = 7.0 Hz, 2H), 1.53 – 1.37 (t, *3J*H-H = 7.0 Hz, 3H). IR (KBr, pellet, cm-1): 3073, 2999, 2938, 2885, 1623, 1550, 1492, 1453, 1346, 1297, 1246, 1232, 1169, 1131, 1047, 949, 873, 855, 802. EI-MS m/z (rel. int.): 351.25 (M+, 56), 323.21 (100), 207.14 (29). EA, Calc. for C21H15F2NO2: C, 71.79; H, 4.30; N, 3.99. Found: C, 71.90; H, 4.47; N, 4.11.

**3PF(2)PF(2)BH:** White solid, yield 88%. 1H-NMR (400 MHz, CDCl3, TMS) δ (ppm) = 8.13 – 8.07 (dd, *3J*H-H = 8.0 Hz, *4J*H-H = 1.6 Hz, 1H), 8.06 – 8.00 (dd, *3J*H-F = 10.5 Hz, *4J*H-H = 1.6 Hz, 1H), 7.84 – 7.76 (m, 1H), 7.65 – 7.57 (m, 1H), 7.57 – 7.50 (dd, *3J*H-H = 7.6 Hz, *4J*H-F = 7.6 Hz, 1H), 7.42 – 7.30 (m, 3H, overlap), 6.84 – 6.78 (dd, *3J*H-H = 8.4 Hz, *4J*H-H = 2.4 Hz, 1H), 6.78 – 6.71 (dd, *3J*H-F = 12.0 Hz, *4J*H-H = 2.4 Hz, 1H), 4.00 – 3.92 (t, *3J*H-H = 6.5 Hz, 2H), 1.91 – 1.78 (m, 2H, overlap), 1.11 – 1.02 (t, *3J*H-H = 7.4 Hz, 3H). IR (KBr, pellet, cm-1): 3070, 2966, 2936, 2877, 1624, 1551, 1486, 1469, 1320, 1271, 1243, 1167, 1103, 1041, 1022, 964, 939, 886, 836, 820. EI-MS m/z (rel. int.): 365.05 (M+, 35), 323.02 (100), 207.01 (4). EA, Calc. for C22H17F2NO2: C, 72.32; H, 4.69; N, 3.83. Found: C, 72.74; H, 4.88; N, 3.87.

**4PF(2)PF(2)BH:** White solid, yield 86%. 1H-NMR (400 MHz, CDCl3, TMS) δ (ppm) = 8.13 – 8.06 (dd, *3J*H-H = 8.0 Hz, *4J*H-H = 1.7 Hz, 1H), 8.06 – 8.00 (dd, *3J*H-F = 10.5 Hz, *4J*H-H = 1.6 Hz, 1H), 7.84 – 7.76 (m, 1H), 7.64 – 7.57 (m, 1H), 7.57 – 7.50 (dd, *3J*H-H = 7.6 Hz, *4J*H-F = 7.6 Hz, 1H), 7.43 – 7.30 (m, 3H, overlap), 6.83 – 6.77 (dd, *3J*H-H = 8.3 Hz, *4J*H-H = 2.5 Hz, 1H), 6.77 – 6.71 (dd, *3J*H-F = 12.0 Hz, *4J*H-H = 2.4 Hz, 1H), 4.04 – 3.96 (t, *3J*H-H = 6.5 Hz, 2H), 1.86 – 1.76 (m, 2H, overlap), 1.57 – 1.44 (m, 2H, overlap), 1.04 – 0.96 (t, *3J*H-H = 7.4 Hz, 3H). IR (KBr, pellet, cm-1): 3058, 2961, 2931, 2873, 1624, 1551, 1488, 1454, 1347, 1289, 1245, 1165, 1114, 1039, 1018, 1001, 943, 884, 864, 803. EI-MS m/z (rel. int.): 379.07 (M+, 29), 323.01 (100), 207 (29). EA, Calc. for C23H19F2NO2: C, 72.81; H, 5.05; N, 3.69. Found: C, 72.75; H, 5.02; N, 3.67.

**5PF(2)PF(2)BH:** White solid, yield 83%. 1H-NMR (400 MHz, CDCl3, TMS) δ (ppm) = 8.13 – 8.06 (dd, *3J*H-H = 8.0 Hz, *4J*H-H = 1.7 Hz, 1H), 8.06 – 8.00 (dd, *3J*H-F = 10.5 Hz, *4J*H-H = 1.6 Hz, 1H), 7.84 – 7.75 (m, 1H), 7.65 – 7.57 (m, 1H), 7.57 – 7.50 (dd, *3J*H-H = 7.7 Hz, *4J*H-F = 7.7 Hz, 1H), 7.43 – 7.30 (m, 3H, overlap), 6.83 – 6.77 (dd, *3J*H-H = 8.6 Hz, *4J*H-H = 2.5 Hz, 1H), 6.77 – 6.70 (dd, *3J*H-F = 12.0 Hz, *4J*H-H = 2.4 Hz, 1H), 4.05 – 3.95 (t, *3J*H-H = 6.5 Hz, 2H), 1.88 – 1.76 (m, 2H, overlap), 1.51 – 1.34 (m, 4H, overlap), 0.99 – 0.91 (t, *3J*H-H = 7.1 Hz, 3H). IR (KBr, pellet, cm-1): 3058, 2982, 2941, 2865, 1626, 1547, 1472, 1452, 1346, 1289, 1242, 1162, 1108, 1056, 1030, 1004, 942, 881, 851, 809. EI-MS m/z (rel. int.): 393.3 (M+, 18), 323.2 (100), 207.14 (4). EA, Calc. for C24H21F2NO2: C, 73.27; H, 5.38; N, 3.56. Found: C, 73.02; H, 5.52; N, 3.52.

**6PF(2)PF(2)BH:** White solid, yield 93%. 1H-NMR (400 MHz, CDCl3, TMS) δ (ppm) = 8.12 – 8.06 (dd, *3J*H-H = 8.1 Hz, *4J*H-H = 1.7 Hz, 1H), 8.06 – 7.99 (dd, *3J*H-F = 10.5 Hz, *4J*H-H = 1.6 Hz, 1H), 7.83 – 7.76 (m, 1H), 7.63 – 7.57 (m, 1H), 7.57 – 7.49 (dd, *3J*H-H = 7.7 Hz, *4J*H-F = 7.7 Hz, 1H), 7.41 – 7.29 (m, 3H, overlap), 6.83 – 6.77 (dd, *3J*H-H = 8.6 Hz, *4J*H-H = 2.4 Hz, 1H), 6.77 – 6.70 (dd, *3J*H-F = 12.0 Hz, *4J*H-H = 2.4 Hz, 1H), 4.03 – 3.94 (t, *3J*H-H = 6.5 Hz, 2H), 1.87 – 1.75 (m, 2H, overlap), 1.54 – 1.32 (m, 6H, overlap), 0.96 – 0.88 (t, *3J*H-H = 7.0 Hz, 3H). IR (KBr, pellet, cm-1): 3076, 2956, 2937, 2867, 1624, 1543, 1472, 1455, 1336, 1294, 1249, 1167, 1108, 1061, 1030, 1002, 935, 887, 832, 812. EI-MS m/z (rel. int.): 407.12 (M+, 24), 323.03 (100), 207.01 (14). EA, Calc. for C25H23F2NO2: C, 73.69; H, 5.69; N, 3.44. Found: C, 73.53; H, 5.82; N, 3.44.

**7PF(2)PF(2)BH:** White solid, yield 92%. 1H-NMR (400 MHz, CDCl3, TMS) δ (ppm) = 8.13 – 8.06 (dd, *3J*H-H = 8.1 Hz, *4J*H-H = 1.7 Hz, 1H), 8.06 – 7.99 (dd, *3J*H-F = 10.5 Hz, *4J*H-H = 1.5 Hz, 1H), 7.83 – 7.75 (m, 1H), 7.65 – 7.57 (m, 1H), 7.57 – 7.49 (dd, *3J*H-H = 7.7 Hz, *4J*H-F = 7.7 Hz, 1H), 7.42 – 7.30 (m, 3H, overlap), 6.83 – 6.77 (dd, *3J*H-H = 8.5 Hz, *4J*H-H = 2.5 Hz, 1H), 6.77 – 6.70 (dd, *3J*H-F = 12.0 Hz, *4J*H-H = 2.4 Hz, 1H), 4.03 – 3.94 (t, *3J*H-H = 6.5 Hz, 2H), 1.87 – 1.75 (m, 2H, overlap), 1.53 – 1.30 (m, 8H, overlap), 0.95 – 0.86 (t, *3J*H-H = 6.9 Hz, 3H). IR (KBr, pellet, cm-1): 3056, 2948, 2923, 2855, 1624, 1557, 1470, 1452, 1346, 1291, 1243, 1169, 1122, 1062, 1039, 1004, 933, 885, 845, 802. EI-MS m/z (rel. int.): 421.14 (M+, 23), 323.03 (100), 207.01 (18). EA, Calc. for C26H25F2NO2: C, 74.09; H, 5.98; N, 3.32. Found: C, 74.11; H, 5.99; N, 3.25.

**8PF(2)PF(2)BH:** White solid, yield 92%. 1H-NMR (400 MHz, CDCl3, TMS) δ (ppm) = 8.13 – 8.07 (dd, *3J*H-H = 8.1 Hz, *4J*H-H = 1.6 Hz, 1H), 8.06 – 7.99 (dd, *3J*H-F = 10.5 Hz, *4J*H-H = 1.5 Hz, 1H), 7.83 – 7.75 (m, 1H), 7.64 – 7.58 (m, 1H), 7.57 – 7.50 (dd, *3J*H-H = 7.7 Hz, *4J*H-F = 7.7 Hz, 1H), 7.42 – 7.30 (m, 3H, overlap), 6.84 – 6.77 (dd, *3J*H-H = 8.5 Hz, *4J*H-H = 2.4 Hz, 1H), 6.77 – 6.71 (dd, *3J*H-F = 12.0 Hz, *4J*H-H = 2.4 Hz, 1H), 4.03 – 3.95 (t, *3J*H-H = 6.5 Hz, 2H), 1.85 – 1.75 (m, 2H, overlap), 1.52 – 1.27 (m, 10H, overlap), 0.94 – 0.85 (t, *3J*H-H = 6.9 Hz, 3H). IR (KBr, pellet, cm-1): 3060, 2956, 2923, 2853, 1624, 1555, 1473, 1454, 1326, 1288, 1243, 1164, 1122, 1061, 1032, 1000, 936, 884, 847, 811. EI-MS m/z (rel. int.): 435.16 (M+, 23), 323.07 (100), 207.02 (58). EA, Calc. for C27H27F2NO2: C, 74.46; H, 6.25; N, 3.22. Found: C, 74.38; H, 6.21; N, 3.21.

**9PF(2)PF(2)BH:** White solid, yield 94%. 1H-NMR (400 MHz, CDCl3, TMS) δ (ppm) = 8.13 – 8.07 (dd, *3J*H-H = 8.0 Hz, *4J*H-H = 1.4 Hz, 1H), 8.07 – 8.00 (dd, *3J*H-F = 10.5 Hz, *4J*H-H = 1.4 Hz, 1H), 7.83 – 7.76 (m, 1H), 7.64 – 7.57 (m, 1H), 7.57 – 7.50 (dd, *3J*H-H = 7.7 Hz, *4J*H-F = 7.7 Hz, 1H), 7.43 – 7.30 (m, 3H, overlap), 6.84 – 6.77 (dd, *3J*H-H = 8.6 Hz, *4J*H-H = 2.3 Hz, 1H), 6.77 – 6.71 (dd, *3J*H-F = 12.0 Hz, *4J*H-H = 2.4 Hz, 1H), 4.03 – 3.95 (t, *3J*H-H = 6.5 Hz, 2H), 1.85 – 1.75 (m, 2H, overlap), 1.53 – 1.27 (m, 12H, overlap), 0.93 – 0.85 (t, *3J*H-H = 6.9 Hz, 3H). IR (KBr, pellet, cm-1): 3059, 2959, 2922, 2851, 1624, 1549, 1473, 1434, 1347, 1291, 1242, 1162, 1133, 1109, 1040, 1004, 950, 880, 852, 809. EI-MS m/z (rel. int.): 449.18 (M+, 21), 323.05 (100), 207.02 (46). EA, Calc. for C28H29F2NO2: C, 74.81; H, 6.50; N, 3.12. Found: C, 74.84; H, 6.41; N, 3.13.

**10PF(2)PF(2)BH:** White solid, yield 90%. 1H-NMR (400 MHz, CDCl3, TMS) δ (ppm) = 8.13 – 8.07 (dd, *3J*H-H = 8.0 Hz, *4J*H-H = 1.7 Hz, 1H), 8.07 – 8.00 (dd, *3J*H-F = 10.5 Hz, *4J*H-H = 1.6 Hz, 1H), 7.83 – 7.76 (m, 1H), 7.65 – 7.57 (m, 1H), 7.57 – 7.49 (dd, *3J*H-H = 7.6 Hz, *4J*H-F = 7.6 Hz, 1H), 7.43 – 7.30 (m, 3H, overlap), 6.84 – 6.78 (dd, *3J*H-H = 8.6 Hz, *4J*H-H = 2.6 Hz, 1H), 6.77 – 6.71 (dd, *3J*H-F = 12.0 Hz, *4J*H-H = 2.4 Hz, 1H), 4.04 – 3.95 (t, *3J*H-H = 6.5 Hz, 2H), 1.87 – 1.75 (m, 2H, overlap), 1.53 – 1.26 (m, 14H, overlap), 0.93 – 0.85 (t, *3J*H-H = 6.9 Hz, 3H). IR (KBr, pellet, cm-1): 3060, 2956, 2923, 2852, 1624, 1556, 1472, 1455, 1310, 1290, 1243, 1164, 1123, 1050, 1030, 1004, 962, 934, 884, 846. EI-MS m/z (rel. int.): 463.21 (M+, 21), 323.06 (100), 207.03 (35). EA, Calc. for C29H31F2NO2: C, 75.14; H, 6.74; N, 3.02. Found: C, 75.00; H, 6.61; N, 3.05.

**2PF(2)PF(2)BM:** White solid, yield 89%. 1H-NMR (400 MHz, CDCl3, TMS) δ (ppm) = 8.10 – 8.04 (dd, *3J*H-H = 8.0 Hz, *4J*H-H = 1.7 Hz, 1H), 8.04 – 7.98 (dd, *3J*H-F = 10.6 Hz, *4J*H-H = 1.6 Hz, 1H), 7.59 – 7.55 (d, *4J*H-H = 1.6 Hz, 1H), 7.55 – 7.49 (dd, *3J*H-H = 7.7 Hz, *4J*H-F = 7.7 Hz, 1H), 7.49 – 7.44 (d, *3J*H-H = 8.3 Hz, 1H), 7.39 – 7.29 (dd, *3J*H-H = 8.6 Hz, *4J*H-F = 8.6 Hz, 1H), 7.22 – 7.15 (dd, *3J*H-H = 8.3 Hz, *4J*H-H = 1.7 Hz, 1H), 6.82 – 6.77 (dd, *3J*H-H = 8.5 Hz, *4J*H-H = 2.5 Hz, 1H), 6.77 – 6.70 (dd, *3J*H-F = 12.0 Hz, *4J*H-H = 2.4 Hz, 1H), 4.13 – 4.02 (q, *3J*H-H = 7.0 Hz, 2H), 2.50 (s, 3H), 1.49 – 1.41 (t, *3J*H-H = 7.0 Hz, 3H). IR (KBr, pellet, cm-1): 3079, 2982, 2920, 2854, 1632, 1556, 1523, 1491, 1476, 1400, 1327, 1268, 1234, 1172, 1114, 1048, 980, 955, 886, 819. EI-MS m/z (rel. int.): 365.06 (M+, 100), 337.05 (76), 207 (7). EA, Calc. for C22H17F2NO2: C, 72.32; H, 4.69; N, 3.83. Found: C, 72.18; H, 4.86; N, 3.93.

**3PF(2)PF(2)BM:** White solid, yield 87%. 1H-NMR (400 MHz, CDCl3, TMS) δ (ppm) = 8.10 – 8.04 (dd, *3J*H-H = 8.0 Hz, *4J*H-H = 1.5 Hz, 1H), 8.04 – 7.97 (dd, *3J*H-F = 10.6 Hz, *4J*H-H = 1.5 Hz, 1H), 7.59 – 7.55 (d, *4J*H-H = 1.6 Hz, 1H), 7.55 – 7.49 (dd, *3J*H-H = 7.7 Hz, *4J*H-F = 7.7 Hz, 1H), 7.49 – 7.43 (d, *3J*H-H = 8.3 Hz, 1H), 7.39 – 7.29 (dd, *3J*H-H = 8.5 Hz, *4J*H-F = 8.5 Hz, 1H), 7.22 – 7.15 (dd, *3J*H-H = 8.3 Hz, *4J*H-H = 1.7 Hz, 1H), 6.84 – 6.77 (dd, *3J*H-H = 8.5 Hz, *4J*H-H = 2.5 Hz, 1H), 6.77 – 6.71 (dd, *3J*H-F = 12.0 Hz, *4J*H-H = 2.4 Hz, 1H), 4.00 – 3.92 (t, *3J*H-H = 6.5 Hz, 2H), 2.49 (s, 3H), 1.91 – 1.79 (m, 2H, overlap), 1.11 – 1.02 (t, *3J*H-H = 7.4 Hz, 3H). IR (KBr, pellet, cm-1): 3067, 2964, 2916, 2870, 1626, 1557, 1520, 1472, 1417, 1330, 1252, 1219, 1167, 1101, 1062, 1023, 1002, 947, 887, 832. EI-MS m/z (rel. int.): 379.07 (M+, 44), 337.05 (100), 207.01 (18). EA, Calc. for C23H19F2NO2: C, 72.81; H, 5.05; N, 3.69. Found: C, 72.34; H, 5.16; N, 3.70.

**4PF(2)PF(2)BM:** White solid, yield 93%. 1H-NMR (400 MHz, CDCl3, TMS) δ (ppm) = 8.10 – 8.04 (dd, *3J*H-H = 8.0 Hz, *4J*H-H = 1.7 Hz, 1H), 8.04 – 7.97 (dd, *3J*H-F = 10.6 Hz, *4J*H-H = 1.6 Hz, 1H), 7.59 – 7.55 (d, *4J*H-H = 1.6 Hz, 1H), 7.55 – 7.49 (dd, *3J*H-H = 7.7 Hz, *4J*H-F = 7.7 Hz, 1H), 7.49 – 7.43 (d, *3J*H-H = 8.3 Hz, 1H), 7.38 – 7.29 (dd, *3J*H-H = 8.6 Hz, *4J*H-F = 8.6 Hz, 1H), 7.22 – 7.15 (dd, *3J*H-H = 8.3 Hz, *4J*H-H = 1.7 Hz, 1H), 6.83 – 6.77 (dd, *3J*H-H = 8.6 Hz, *4J*H-H = 2.5 Hz, 1H), 6.77 – 6.71 (dd, *3J*H-F = 12.0 Hz, *4J*H-H = 2.4 Hz, 1H), 4.04 – 3.96 (t, *3J*H-H = 6.5 Hz, 2H), 2.49 (s, 3H), 1.86 – 1.74 (m, 2H, overlap), 1.57 – 1.46 (m, 2H, overlap), 1.06 – 0.95 (t, *3J*H-H = 7.4 Hz, 3H). IR (KBr, pellet, cm-1): 3070, 2959, 2931, 2872, 1624, 1555, 1521, 1476, 1423, 1335, 1294, 1166, 1125, 1061, 1040, 1001, 955, 886, 862. EI-MS m/z (rel. int.): 393.09 (M+, 36), 337.04 (100), 207.01 (14). EA, Calc. for C24H21F2NO2: C, 73.27; H, 5.38; N, 3.56. Found: C, 73.15; H, 5.31; N, 3.55.

**5PF(2)PF(2)BM:** White solid, yield 78%. 1H-NMR (400 MHz, CDCl3, TMS) δ (ppm) = 8.10 – 8.04 (dd, *3J*H-H = 8.0 Hz, *4J*H-H = 1.6 Hz, 1H), 8.04 – 7.97 (dd, *3J*H-F = 10.6 Hz, *4J*H-H = 1.6 Hz, 1H), 7.59 – 7.55 (d, *4J*H-H = 1.6 Hz, 1H), 7.55 – 7.49 (dd, *3J*H-H = 7.7 Hz, *4J*H-F = 7.7 Hz, 1H), 7.49 – 7.43 (d, *3J*H-H = 8.3 Hz, 1H), 7.38 – 7.29 (dd, *3J*H-H = 8.5 Hz, *4J*H-F = 8.5 Hz, 1H), 7.22 – 7.15 (dd, *3J*H-H = 8.3 Hz, *4J*H-H = 1.7 Hz, 1H), 6.83 – 6.77 (dd, *3J*H-H = 8.5 Hz, *4J*H-H = 2.4 Hz, 1H), 6.77 – 6.70 (dd, *3J*H-F = 12.0 Hz, *4J*H-H = 2.5 Hz, 1H), 4.03 – 3.94 (t, *3J*H-H = 6.5 Hz, 2H), 2.49 (s, 3H), 1.86 – 1.77 (m, 2H, overlap), 1.52 – 1.35 (m, 4H, overlap), 0.99 – 0.91 (t, *3J*H-H = 7.1 Hz, 3H). IR (KBr, pellet, cm-1): 3073, 2960, 2922, 2873, 1626, 1555, 1520, 1473, 1336, 1295, 1165, 1127, 1111, 1058, 1028, 1002, 954, 887, 860, 802. EI-MS m/z (rel. int.): 407.42 (M+, 19), 337.25 (90), 207.09 (100). EA, Calc. for C25H23F2NO2: C, 73.69; H, 5.69; N, 3.44. Found: C, 73.47; H, 5.79; N, 3.40.

**6PF(2)PF(2)BM:** White solid, yield 90%. 1H-NMR (400 MHz, CDCl3, TMS) δ (ppm) = 8.10 – 8.04 (dd, *3J*H-H = 8.1 Hz, *4J*H-H = 1.6 Hz, 1H), 8.04 – 7.97 (dd, *3J*H-F = 10.5 Hz, *4J*H-H = 1.5 Hz, 1H), 7.59 – 7.55 (d, *4J*H-H = 1.6 Hz, 1H), 7.55 – 7.49 (dd, *3J*H-H = 7.7 Hz, *4J*H-F = 7.7 Hz, 1H), 7.49 – 7.43 (d, *3J*H-H = 8.3 Hz, 1H), 7.38 – 7.29 (dd, *3J*H-H = 8.5 Hz, *4J*H-F = 8.5 Hz, 1H), 7.22 – 7.15 (dd, *3J*H-H = 8.3 Hz, *4J*H-H = 1.7 Hz, 1H), 6.83 – 6.77 (dd, *3J*H-H = 8.5 Hz, *4J*H-H = 2.5 Hz, 1H), 6.77 – 6.70 (dd, *3J*H-F = 12.0 Hz, *4J*H-H = 2.4 Hz, 1H), 4.02 – 3.94 (t, *3J*H-H = 6.5 Hz, 2H), 2.49 (s, 3H), 1.87 – 1.73 (m, 2H, overlap), 1.54 – 1.32 (m, 6H, overlap), 0.96 – 0.88 (t, *3J*H-H = 7.1 Hz, 3H). IR (KBr, pellet, cm-1): 3067, 2956, 2931, 2867, 1623, 1557, 1519, 1474, 1422, 1201, 1212, 1163, 1116, 1063, 1034, 944, 869, 835, 801. EI-MS m/z (rel. int.): 421.35 (M+, 24), 337.2 (100), 207.12 (59). EA, Calc. for C26H25F2NO2: C, 74.09; H, 5.98; N, 3.32. Found: C, 73.96; H, 6.09; N, 3.33.

**7PF(2)PF(2)BM:** White solid, yield 92%. 1H-NMR (400 MHz, CDCl3, TMS) δ (ppm) = 8.11 – 8.04 (dd, *3J*H-H = 8.0 Hz, *4J*H-H = 1.6 Hz, 1H), 8.04 – 7.97 (dd, *3J*H-F = 10.5 Hz, *4J*H-H = 1.5 Hz, 1H), 7.59 – 7.55 (d, *4J*H-H = 1.6 Hz, 1H), 7.55 – 7.49 (dd, *3J*H-H = 7.7 Hz, *4J*H-F = 7.7 Hz, 1H), 7.49 – 7.43 (d, *3J*H-H = 8.3 Hz, 1H), 7.38 – 7.29 (dd, *3J*H-H = 8.5 Hz, *4J*H-F = 8.5 Hz, 1H), 7.22 – 7.15 (dd, *3J*H-H = 8.3 Hz, *4J*H-H = 1.6 Hz, 1H), 6.83 – 6.77 (dd, *3J*H-H = 8.5 Hz, *4J*H-H = 2.4 Hz, 1H), 6.77 – 6.70 (dd, *3J*H-F = 12.0 Hz, *4J*H-H = 2.4 Hz, 1H), 4.03 – 3.94 (t, *3J*H-H = 6.5 Hz, 2H), 2.50 (s, 3H), 1.87 – 1.75 (m, 2H, overlap), 1.52 – 1.30 (m, 8H, overlap), 0.95 – 0.86 (t, *3J*H-H = 6.9 Hz, 3H). IR (KBr, pellet, cm-1): 3050, 2948, 2922, 2854, 1625, 1557, 1519, 1474, 1414, 1333, 1293, 1263, 1214, 1168, 1121, 1039, 947, 887, 846, 811. EI-MS m/z (rel. int.): 435.15 (M+, 31), 337.05 (100), 207 (77). EA, Calc. for C27H27F2NO2: C, 74.46; H, 6.25; N, 3.22. Found: C, 74.23; H, 6.18; N, 3.22.

**8PF(2)PF(2)BM:** White solid, yield 92%. 1H-NMR (400 MHz, CDCl3, TMS) δ (ppm) = 8.10 – 8.04 (dd, *3J*H-H = 8.0 Hz, *4J*H-H = 1.6 Hz, 1H), 8.03 – 7.97 (dd, *3J*H-F = 10.5 Hz, *4J*H-H = 1.5 Hz, 1H), 7.59 – 7.55 (d, *4J*H-H = 1.6 Hz, 1H), 7.55 – 7.49 (dd, *3J*H-H = 7.7 Hz, *4J*H-F = 7.7 Hz, 1H), 7.49 – 7.43 (d, *3J*H-H = 8.3 Hz, 1H), 7.38 – 7.29 (dd, *3J*H-H = 8.5 Hz, *4J*H-F = 8.5 Hz, 1H), 7.22 – 7.15 (dd, *3J*H-H = 8.3 Hz, *4J*H-H = 1.6 Hz, 1H), 6.83 – 6.77 (dd, *3J*H-H = 8.5 Hz, *4J*H-H = 2.4 Hz, 1H), 6.77 – 6.70 (dd, *3J*H-F = 11.9 Hz, *4J*H-H = 2.3 Hz, 1H), 4.02 – 3.94 (t, *3J*H-H = 6.5 Hz, 2H), 2.49 (s, 3H), 1.85 – 1.74 (m, 2H, overlap), 1.55 – 1.27 (m, 10H, overlap), 0.94 – 0.86 (t, *3J*H-H = 6.9 Hz, 3H). IR (KBr, pellet, cm-1): 3054, 2950, 2924, 2854, 1626, 1557, 1518, 1472, 1413, 1332, 1294, 1262, 1214, 1170, 1120, 1041, 946, 886, 845, 810. EI-MS m/z (rel. int.): 449.17 (M+, 30), 337.06 (100), 207.02 (21). EA, Calc. for C28H29F2NO2: C, 74.81; H, 6.50; N, 3.12. Found: C, 74.98; H, 6.36; N, 3.14.

**9PF(2)PF(2)BM:** White solid, yield 90%. 1H-NMR (400 MHz, CDCl3, TMS) δ (ppm) = 8.11 – 8.04 (dd, *3J*H-H = 8.0 Hz, *4J*H-H = 1.6 Hz, 1H), 8.04 – 7.97 (dd, *3J*H-F = 10.5 Hz, *4J*H-H = 1.6 Hz, 1H), 7.59 – 7.55 (d, *4J*H-H = 1.6 Hz, 1H), 7.55 – 7.49 (dd, *3J*H-H = 7.7 Hz, *4J*H-F = 7.7 Hz, 1H), 7.49 – 7.42 (d, *3J*H-H = 8.3 Hz, 1H), 7.38 – 7.29 (dd, *3J*H-H = 8.5 Hz, *4J*H-F = 8.5 Hz, 1H), 7.22 – 7.15 (dd, *3J*H-H = 8.3 Hz, *4J*H-H = 1.6 Hz, 1H), 6.83 – 6.77 (dd, *3J*H-H = 8.5 Hz, *4J*H-H = 2.4 Hz, 1H), 6.77 – 6.70 (dd, *3J*H-F = 12.0 Hz, *4J*H-H = 2.4 Hz, 1H), 4.03 – 3.95 (t, *3J*H-H = 6.5 Hz, 2H), 2.50 (s, 3H), 1.87 – 1.75 (m, 2H, overlap), 1.53 – 1.27 (m, 12H, overlap), 0.94 – 0.85 (t, *3J*H-H = 6.9 Hz, 3H). IR (KBr, pellet, cm-1): 3076, 2943, 2918, 2851, 1626, 1553, 1522, 1473, 1333, 1295, 1163, 1112, 1109, 1057, 1022, 1002, 954, 887, 849, 803. EI-MS m/z (rel. int.): 463.22 (M+, 30), 337.08 (94), 207.03 (100). EA, Calc. for C29H31F2NO2: C, 75.14; H, 6.74; N, 3.02. Found: C, 75.74; H, 6.70; N, 3.08.

**10PF(2)PF(2)BM:** White solid, yield 92%. 1H-NMR (400 MHz, CDCl3, TMS) δ (ppm) = 8.11 – 8.04 (dd, *3J*H-H = 8.0 Hz, *4J*H-H = 1.6 Hz, 1H), 8.04 – 7.97 (dd, *3J*H-F = 10.5 Hz, *4J*H-H = 1.6 Hz, 1H), 7.59 – 7.55 (d, *4J*H-H = 1.6 Hz, 1H), 7.55 – 7.49 (dd, *3J*H-H = 7.7 Hz, *4J*H-F = 7.7 Hz, 1H), 7.49 – 7.43 (d, *3J*H-H = 8.3 Hz, 1H), 7.38 – 7.29 (dd, *3J*H-H = 8.5 Hz, *4J*H-F = 8.5 Hz, 1H), 7.22 – 7.15 (dd, *3J*H-H = 8.3 Hz, *4J*H-H = 1.6 Hz, 1H), 6.83 – 6.77 (dd, *3J*H-H = 8.5 Hz, *4J*H-H = 2.4 Hz, 1H), 6.77 – 6.70 (dd, *3J*H-F = 12.0 Hz, *4J*H-H = 2.4 Hz, 1H), 4.03 – 3.95 (t, *3J*H-H = 6.5 Hz, 2H), 2.50 (s, 3H), 1.87 – 1.75 (m, 2H, overlap), 1.53 – 1.26 (m, 14H, overlap), 0.93 – 0.85 (t, *3J*H-H = 6.9 Hz, 3H). IR (KBr, pellet, cm-1): 3051, 2950, 2924, 2852, 1625, 1556, 1519, 1473, 1414, 1291, 1263, 1213, 1166, 1121, 1030, 946, 887, 845, 809. EI-MS m/z (rel. int.): 477.2 (M+, 29), 337.06 (100), 207.02 (33). EA, Calc. for C30H33F2NO2: C, 75.45; H, 6.96; N, 2.93. Found: C, 75.59; H, 6.79; N, 2.95.

**2PF(2)PF(2)BN:** White solid, yield 92%. 1H-NMR (400 MHz, CDCl3, TMS) δ (ppm) = 8.69 – 8.64 (d, *4J*H-H = 2.3 Hz, 1H), 8.39 – 8.31 (dd, *3J*H-H = 8.9 Hz, *4J*H-H = 2.3 Hz, 1H), 8.14 – 8.07 (dd, *3J*H-H = 8.0 Hz, *4J*H-H = 1.7 Hz, 1H), 8.07 – 8.00 (dd, *3J*H-F = 10.3 Hz, *4J*H-H = 1.6 Hz, 1H), 7.74 – 7.67 (d, *3J*H-H = 8.9 Hz, 1H), 7.62 – 7.53 (dd, *3J*H-H = 7.6 Hz, *4J*H-F = 7.6 Hz, 1H), 7.39 – 7.30 (dd, *3J*H-H = 8.6 Hz, *4J*H-F = 8.6 Hz, 1H), 6.84 – 6.78 (dd, *3J*H-H = 8.6 Hz, *4J*H-H = 2.5 Hz, 1H), 6.77 – 6.70 (dd, *3J*H-F = 12.0 Hz, *4J*H-H = 2.4 Hz, 1H), 4.13 – 4.03 (q, *3J*H-H = 7.0 Hz, 2H), 1.50 – 1.42 (t, *3J*H-H = 7.0 Hz, 3H). IR (KBr, pellet, cm-1): 3106, 2940, 2863, 1624, 1555, 1527, 1483, 1432, 1347, 1297, 1259, 1235, 1165, 1120, 1046, 978, 949, 891, 840, 809. EI-MS m/z (rel. int.): 396.02 (M+, 56), 368 (56), 207.01 (42). EA, Calc. for C21H14F2N2O4: C, 63.64; H, 3.56; N, 7.07. Found: C, 62.09; H, 3.59; N, 7.02.

**3PF(2)PF(2)BN:** White solid, yield 81%. 1H-NMR (400 MHz, CDCl3, TMS) δ (ppm) = 8.68 – 8.63 (d, *4J*H-H = 2.3 Hz, 1H), 8.38 – 8.30 (dd, *3J*H-H = 8.9 Hz, *4J*H-H = 2.3 Hz, 1H), 8.14 – 8.06 (dd, *3J*H-H = 8.0 Hz, *4J*H-H = 1.7 Hz, 1H), 8.06 – 7.99 (dd, *3J*H-F = 10.3 Hz, *4J*H-H = 1.6 Hz, 1H), 7.74 – 7.66 (d, *3J*H-H = 8.9 Hz, 1H), 7.61 – 7.54 (dd, *3J*H-H = 7.7 Hz, *4J*H-F = 7.7 Hz, 1H), 7.39 – 7.30 (dd, *3J*H-H = 8.6 Hz, *4J*H-F = 8.6 Hz, 1H), 6.85 – 6.78 (dd, *3J*H-H = 8.6 Hz, *4J*H-H = 2.5 Hz, 1H), 6.78 – 6.71 (dd, *3J*H-F = 12.1 Hz, *4J*H-H = 2.5 Hz, 1H), 4.03 – 3.93 (t, *3J*H-H = 6.5 Hz, 2H), 1.92 – 1.78 (m, 2H, overlap), 1.13 – 1.02 (t, *3J*H-H = 7.4 Hz, 3H). IR (KBr, pellet, cm-1): 3106, 2973, 2882, 1626, 1553, 1528, 1485, 1432, 1347, 1259, 1236, 1165, 1119, 1054, 1031, 996, 949, 888, 840, 808. EI-MS m/z (rel. int.): 410.08 (M+, 37), 368.03 (91), 207.02 (65). EA, Calc. for C22H16F2N2O4: C, 64.39; H, 3.93; N, 6.83. Found: C, 64.55; H, 4.01; N, 6.89.

**4PF(2)PF(2)BN:** White solid, yield 87%. 1H-NMR (400 MHz, CDCl3, TMS) δ (ppm) = 8.68 – 8.63 (d, *4J*H-H = 2.3 Hz, 1H), 8.38 – 8.31 (dd, *3J*H-H = 8.9 Hz, *4J*H-H = 2.2 Hz, 1H), 8.13 – 8.06 (dd, *3J*H-H = 8.0 Hz, *4J*H-H = 1.7 Hz, 1H), 8.06 – 7.99 (dd, *3J*H-F = 10.3 Hz, *4J*H-H = 1.6 Hz, 1H), 7.74 – 7.66 (d, *3J*H-H = 8.9 Hz, 1H), 7.62 – 7.53 (dd, *3J*H-H = 7.6 Hz, *4J*H-F = 7.6 Hz, 1H), 7.39 – 7.30 (dd, *3J*H-H = 8.6 Hz, *4J*H-F = 8.6 Hz, 1H), 6.84 – 6.78 (dd, *3J*H-H = 8.5 Hz, *4J*H-H = 2.4 Hz, 1H), 6.78 – 6.71 (dd, *3J*H-F = 12.0 Hz, *4J*H-H = 2.4 Hz, 1H), 4.05 – 3.96 (t, *3J*H-H = 6.5 Hz, 2H), 1.85 – 1.74 (m, 2H, overlap), 1.57 – 1.46 (m, 2H, overlap), 1.06 – 0.95 (t, *3J*H-H = 7.4 Hz, 3H). IR (KBr, pellet, cm-1): 3106, 2962, 2876, 1626, 1527, 1485, 1432, 1346, 1297, 1259, 1237, 1165, 1119, 1041, 1004, 949, 935, 888, 839, 809. EI-MS m/z (rel. int.): 424.06 (M+, 26), 368 (87), 207 (100). EA, Calc. for C23H18F2N2O4: C, 65.09; H, 4.28; N, 6.60. Found: C, 65.24; H, 4.26; N, 6.62.

**5PF(2)PF(2)BN:** White solid, yield 90%. 1H-NMR (400 MHz, CDCl3, TMS) δ (ppm) = 8.68 – 8.63 (d, *4J*H-H = 2.3 Hz, 1H), 8.38 – 8.31 (dd, *3J*H-H = 8.9 Hz, *4J*H-H = 2.3 Hz, 1H), 8.13 – 8.06 (dd, *3J*H-H = 8.1 Hz, *4J*H-H = 1.7 Hz, 1H), 8.06 – 7.98 (dd, *3J*H-F = 10.3 Hz, *4J*H-H = 1.6 Hz, 1H), 7.74 – 7.67 (d, *3J*H-H = 8.9 Hz, 1H), 7.61 – 7.52 (dd, *3J*H-H = 7.6 Hz, *4J*H-F = 7.6 Hz, 1H), 7.39 – 7.29 (dd, *3J*H-H = 8.6 Hz, *4J*H-F = 8.6 Hz, 1H), 6.84 – 6.77 (dd, *3J*H-H = 8.6 Hz, *4J*H-H = 2.5 Hz, 1H), 6.77 – 6.70 (dd, *3J*H-F = 12.0 Hz, *4J*H-H = 2.4 Hz, 1H), 4.03 – 3.95 (t, *3J*H-H = 6.5 Hz, 2H), 1.86 – 1.76 (m, 2H, overlap), 1.53 – 1.35 (m, 4H, overlap), 0.99 – 0.90 (t, *3J*H-H = 7.1 Hz, 3H). IR (KBr, pellet, cm-1): 3107, 2956, 2871, 1626, 1555, 1528, 1485, 1432, 1347, 1296, 1259, 1236, 1165, 1118, 1031, 949, 934, 889, 839, 808. EI-MS m/z (rel. int.): 438.23 (M+, 4), 368.26 (19), 207.09 (100). EA, Calc. for C24H20F2N2O4: C, 65.75; H, 4.60; N, 6.39. Found: C, 65.59; H, 4.76; N, 6.36.

**6PF(2)PF(2)BN:** White solid, yield 91%. 1H-NMR (400 MHz, CDCl3, TMS) δ (ppm) = 8.67 – 8.62 (d, *4J*H-H = 2.2 Hz, 1H), 8.37 – 8.30 (dd, *3J*H-H = 8.9 Hz, *4J*H-H = 2.3 Hz, 1H), 8.12 – 8.05 (dd, *3J*H-H = 8.0 Hz, *4J*H-H = 1.6 Hz, 1H), 8.05 – 7.98 (dd, *3J*H-F = 10.2 Hz, *4J*H-H = 1.6 Hz, 1H), 7.74 – 7.66 (d, *3J*H-H = 8.9 Hz, 1H), 7.61 – 7.52 (dd, *3J*H-H = 7.6 Hz, *4J*H-F = 7.6 Hz, 1H), 7.38 – 7.29 (dd, *3J*H-H = 8.5 Hz, *4J*H-F = 8.5 Hz, 1H), 6.84 – 6.77 (dd, *3J*H-H = 8.6 Hz, *4J*H-H = 2.4 Hz, 1H), 6.77 – 6.70 (dd, *3J*H-F = 12.0 Hz, *4J*H-H = 2.3 Hz, 1H), 4.03 – 3.95 (t, *3J*H-H = 6.5 Hz, 2H), 1.87 – 1.75 (m, 2H, overlap), 1.55 – 1.32 (m, 6H, overlap), 0.96 – 0.87 (t, *3J*H-H = 7.1 Hz, 3H). IR (KBr, pellet, cm-1): 3102, 2942, 2862, 1626, 1532, 1490, 1432, 1335, 1287, 1260, 1230, 1171, 1125, 1108, 1034, 998, 952, 889, 835, 808. EI-MS m/z (rel. int.): 452.11 (M+, 4), 368.05 (16), 207.01 (100). EA, Calc. for C25H22F2N2O4: C, 66.37; H, 4.90; N, 6.19. Found: C, 66.24; H, 5.02; N, 6.19.

**7PF(2)PF(2)BN:** White solid, yield 87%. 1H-NMR (400 MHz, CDCl3, TMS) δ (ppm) = 8.68 – 8.63 (d, *4J*H-H = 2.2 Hz, 1H), 8.38 – 8.31 (dd, *3J*H-H = 8.9 Hz, *4J*H-H = 2.3 Hz, 1H), 8.13 – 8.06 (dd, *3J*H-H = 8.0 Hz, *4J*H-H = 1.6 Hz, 1H), 8.06 – 7.98 (dd, *3J*H-F = 10.1 Hz, *4J*H-H = 1.6 Hz, 1H), 7.74 – 7.66 (d, *3J*H-H = 8.9 Hz, 1H), 7.61 – 7.52 (dd, *3J*H-H = 7.6 Hz, *4J*H-F = 7.6 Hz, 1H), 7.39 – 7.29 (dd, *3J*H-H = 8.5 Hz, *4J*H-F = 8.5 Hz, 1H), 6.84 – 6.77 (dd, *3J*H-H = 8.6 Hz, *4J*H-H = 2.4 Hz, 1H), 6.77 – 6.70 (dd, *3J*H-F = 12.0 Hz, *4J*H-H = 2.3 Hz, 1H), 4.02 – 3.96 (t, *3J*H-H = 6.5 Hz, 2H), 1.87 – 1.75 (m, 2H, overlap), 1.53 – 1.29 (m, 8H, overlap), 0.94 – 0.86 (t, *3J*H-H = 6.9 Hz, 3H). IR (KBr, pellet, cm-1): 3108, 2923, 2876, 1631, 1573, 1523, 1488, 1345, 1295, 1260, 1170, 1139, 1118, 1037, 1005, 956, 887, 860, 828, 807. EI-MS m/z (rel. int.): 466.13 (M+, 16), 368.03 (81), 207.02 (100). EA, Calc. for C26H24F2N2O4: C, 66.94; H, 5.19; N, 6.01. Found: C, 66.47; H, 5.22; N, 6.03.

**8PF(2)PF(2)BN:** White solid, yield 87%. 1H-NMR (400 MHz, CDCl3, TMS) δ (ppm) = 8.69 – 8.63 (d, *4J*H-H = 2.2 Hz, 1H), 8.38 – 8.31 (dd, *3J*H-H = 8.9 Hz, *4J*H-H = 2.1 Hz, 1H), 8.13 – 8.06 (dd, *3J*H-H = 8.0 Hz, *4J*H-H = 1.6 Hz, 1H), 8.06 – 7.99 (dd, *3J*H-F = 10.2 Hz, *4J*H-H = 1.6 Hz, 1H), 7.74 – 7.67 (d, *3J*H-H = 9.0 Hz, 1H), 7.61 – 7.53 (dd, *3J*H-H = 7.6 Hz, *4J*H-F = 7.6 Hz, 1H), 7.39 – 7.30 (dd, *3J*H-H = 8.5 Hz, *4J*H-F = 8.5 Hz, 1H), 6.84 – 6.77 (dd, *3J*H-H = 8.6 Hz, *4J*H-H = 2.4 Hz, 1H), 6.77 – 6.71 (dd, *3J*H-F = 12.0 Hz, *4J*H-H = 2.2 Hz, 1H), 4.03 – 3.95 (t, *3J*H-H = 6.5 Hz, 2H), 1.87 – 1.75 (m, 2H, overlap), 1.54 – 1.22 (m, 10H, overlap), 0.93 – 0.85 (t, *3J*H-H = 6.9 Hz, 3H). IR (KBr, pellet, cm-1): 3107, 2923, 2858, 1628, 1554, 1526, 1485, 1433, 1347, 1298, 1259, 1237, 1164, 1117, 1033, 1002, 949, 889, 839, 808. EI-MS m/z (rel. int.): 480.15 (M+, 15), 368.02 (76), 207.01 (100). EA, Calc. for C27H26F2N2O4: C, 67.49; H, 5.45; N, 5.83. Found: C, 67.72; H, 5.31; N, 5.92.

**9PF(2)PF(2)BN:** White solid, yield 80%. 1H-NMR (400 MHz, CDCl3, TMS) δ (ppm) = 8.69 – 8.64 (d, *4J*H-H = 2.2 Hz, 1H), 8.39 – 8.31 (dd, *3J*H-H = 8.9 Hz, *4J*H-H = 2.3 Hz, 1H), 8.14 – 8.07 (dd, *3J*H-H = 8.1 Hz, *4J*H-H = 1.6 Hz, 1H), 8.07 – 8.00 (dd, *3J*H-F = 10.2 Hz, *4J*H-H = 1.6 Hz, 1H), 7.74 – 7.64 (d, *3J*H-H = 8.9 Hz, 1H), 7.64 – 7.51 (dd, *3J*H-H = 7.6 Hz, *4J*H-F = 7.6 Hz, 1H), 7.39 – 7.30 (dd, *3J*H-H = 8.5 Hz, *4J*H-F = 8.5 Hz, 1H), 6.84 – 6.78 (dd, *3J*H-H = 8.5 Hz, *4J*H-H = 2.5 Hz, 1H), 6.78 – 6.71 (dd, *3J*H-F = 12.0 Hz, *4J*H-H = 2.4 Hz, 1H), 4.04 – 3.96 (t, *3J*H-H = 6.5 Hz, 2H), 1.87 – 1.75 (m, 2H, overlap), 1.53 – 1.27 (m, 12H, overlap), 0.93 – 0.85 (t, *3J*H-H = 6.9 Hz, 3H). IR (KBr, pellet, cm-1): 3107, 2920, 2855, 1627, 1528, 1485, 1433, 1346, 1259, 1237, 1164, 1117, 1072, 1038, 1007, 949, 934, 888, 839, 807. EI-MS m/z (rel. int.): 494.17 (M+, 13), 368.02 (69), 207 (100). EA, Calc. for C28H28F2N2O4: C, 68.00; H, 5.71; N, 5.66. Found: C, 68.06; H, 5.61; N, 5.71.

**10PF(2)PF(2)BN:** White solid, yield 82%. 1H-NMR (400 MHz, CDCl3, TMS) δ (ppm) = 8.69 – 8.64 (d, *4J*H-H = 2.2 Hz, 1H), 8.38 – 8.31 (dd, *3J*H-H = 8.9 Hz, *4J*H-H = 2.3 Hz, 1H), 8.14 – 8.07 (dd, *3J*H-H = 8.0 Hz, *4J*H-H = 1.6 Hz, 1H), 8.07 – 7.99 (dd, *3J*H-F = 10.2 Hz, *4J*H-H = 1.6 Hz, 1H), 7.74 – 7.66 (d, *3J*H-H = 8.9 Hz, 1H), 7.62 – 7.53 (dd, *3J*H-H = 7.6 Hz, *4J*H-F = 7.6 Hz, 1H), 7.39 – 7.30 (dd, *3J*H-H = 8.5 Hz, *4J*H-F = 8.5 Hz, 1H), 6.84 – 6.78 (dd, *3J*H-H = 8.5 Hz, *4J*H-H = 2.4 Hz, 1H), 6.78 – 6.71 (dd, *3J*H-F = 12.0 Hz, *4J*H-H = 2.4 Hz, 1H), 4.04 – 3.96 (t, *3J*H-H = 6.5 Hz, 2H), 1.87 – 1.75 (m, 2H, overlap), 1.53 – 1.26 (m, 14H, overlap), 0.93 – 0.85 (t, *3J*H-H = 6.9 Hz, 3H). IR (KBr, pellet, cm-1): 3107, 2920, 2855, 1627, 1554, 1528, 1485, 1433, 1346, 1298, 1259, 1237, 1164, 1117, 1034, 949, 934, 889, 839, 808. EI-MS m/z (rel. int.): 508.25 (M+, 4), 368.04 (18), 207.01 (100). EA, Calc. for C29H30F2N2O4: C, 68.49; H, 5.95; N, 5.51. Found: C, 68.38; H, 5.80; N, 5.58.
